# Supplementary material
Source: bioRxiv or medRxiv preprint supplement (https://www.biorxiv.org/highwire/filestream/73226/field_highwire_adjunct_files/0/239269-1.pdf)
Supplement: Supplementary file [file 239269-1.pdf]

Supplementary information for

# Shared Genetic Contributions to Atrial Fibrillation and Ischemic Stroke Risk

Sara L. Pulit, Lu-Chen Weng, Patrick F McArdle, Ludovic Trinquart, Seung Hoan Choi, Braxton D. Mitchell, Jonathan Rosand, Paul I W de Bakker, Emelia J Benjamin, Patrick T Ellinor, Steven J Kittner, Steven A Lubitz\*, Christopher D Anderson\*, on behalf of the Atrial Fibrillation Genetics Consortium and the International Stroke Genetics Consortium.

## **Code and data release**

For access to code, sample identifiers, SNP identifiers, and SNP weights used in the construction of the genetic risk score, please see this GitHub repository: <https://github.com/UMCUGenetics/Afib-Stroke-Overlap>.

## Table of Contents

|                                                                        |               |
|------------------------------------------------------------------------|---------------|
| Supplementary Tables                                                   | Pages 3 – 12  |
| Supplementary Figures                                                  | Pages 13 – 20 |
| Supplementary Methods                                                  | Pages 21 – 24 |
| Appendix I: Atrial Fibrillation Genetics (AFGen)<br>Consortium members | Pages 25 – 28 |
| Appendix II: Stroke Genetics Network (SiGN) Consortium<br>members      | Pages 29 – 32 |

## Supplementary Tables

### Supplementary Table 1 | Atrial fibrillation cases and controls available from the Stroke Genetics Network (SiGN) Consortium.

As classified by the CCS Causative system (note that this table is a repeat of **Table 1** from the main manuscript):

| Phenotype                      | Total | Cardioembolic | Large artery atherosclerosis | Small artery occlusion | Undetermined            |                      |
|--------------------------------|-------|---------------|------------------------------|------------------------|-------------------------|----------------------|
|                                |       |               |                              |                        | Incomplete/unclassified | Cryptogenic/CE minor |
| Atrial fibrillation            | 1,751 | 1,495         | 63                           | 32                     | 151                     | 0                    |
| Paroxysmal atrial fibrillation | 1,315 | 1,088         | 52                           | 23                     | 138                     | 0                    |
| Left atrial thrombus           | 48    | 37            | 3                            | 3                      | 4                       | 0                    |
| Sick sinus syndrome            | 79    | 65            | 5                            | 3                      | 4                       | 0                    |
| Atrial Flutter                 | 106   | 90            | 4                            | 2                      | 10                      | 0                    |
| Total                          | 3,190 | 2,684         | 123                          | 61                     | 298                     | 0                    |

As classified by the CCS Phenotypic system (note that this system allows a case to be classified into more than one subtype):

| Phenotype                      | Total | Cardioembolic | Large artery atherosclerosis | Small artery occlusion | Undetermined |
|--------------------------------|-------|---------------|------------------------------|------------------------|--------------|
| Atrial fibrillation            | 1,751 | 1,751         | 161                          | 58                     | 0            |
| Paroxysmal atrial fibrillation | 1,315 | 1,315         | 126                          | 61                     | 0            |
| Left atrial thrombus           | 48    | 48            | 7                            | 4                      | 0            |
| Sick sinus syndrome            | 79    | 79            | 8                            | 4                      | 0            |
| Atrial Flutter                 | 106   | 106           | 11                           | 3                      | 0            |
| Total                          | 3,190 | 3,190         | 302                          | 126                    | 0            |

*As classified by the TOAST system:*

| Phenotype                      | Total | Cardioembolic | Large artery atherosclerosis | Small artery occlusion | Undetermined |
|--------------------------------|-------|---------------|------------------------------|------------------------|--------------|
| Atrial fibrillation            | 1,751 | 1,254         | 26                           | 23                     | 170          |
| Paroxysmal atrial fibrillation | 1,315 | 880           | 25                           | 19                     | 178          |
| Left atrial thrombus           | 48    | 35            | 1                            | 1                      | 9            |
| Sick sinus syndrome            | 79    | 48            | 0                            | 1                      | 13           |
| Atrial Flutter                 | 106   | 75            | 2                            | 3                      | 12           |
| Total                          | 3,190 | 2,207         | 54                           | 47                     | 371          |

*Overlap of atrial fibrillation and cardioembolic stroke in the three subtyping systems in SiGN (CCSc, CCS Causative; CCSp, CCS Phenotypic; TOAST):*

| Phenotype                         | CCSc Cardioembolic | CCSp Cardioembolic | TOAST Cardioembolic |
|-----------------------------------|--------------------|--------------------|---------------------|
| Atrial fibrillation               | 1,495              | 1,751              | 1,254               |
| Paroxysmal atrial fibrillation    | 1,088              | 1,315              | 880                 |
| Left atrial thrombus              | 37                 | 48                 | 35                  |
| Sick sinus syndrome               | 65                 | 79                 | 48                  |
| Atrial Flutter                    | 90                 | 106                | 75                  |
| No atrial fibrillation phenotypes | 316                | 418                | 903                 |
| Total                             | 3,000              | 3,608              | 3,333               |

**Supplementary Table 2 | Look-up of previously-associated atrial fibrillation**

**SNPs in SiGN.** After performing a GWAS of atrial fibrillation in the SiGN data, we looked up the 26 known genetic risk loci for atrial fibrillation, as identified in the latest GWAS.<sup>1</sup> Twenty-four of the 25 signals present in the SiGN data were directionally consistent with the previous GWAS. The only signal not directionally consistent was discovered through eQTL analysis. One signal, a rare variant burden signal, was absent from our data (all SNPs here have allele frequency > 1%).

Supplementary Table 2 is provided as a separate, downloadable Excel spreadsheet as well as a tab-delimited text available at the project GitHub repository (download: <https://github.com/saralpulit/Afib-Stroke-Overlap/blob/master/SupplementaryTable2.afib.hits.SiGN-lookup.txt>). The first 14 columns are taken from *Christophersen, et al. Large-scale analysis of common and rare variants identify 12 new loci associated with atrial fibrillation. Nature Genetics, 2017.*<sup>1</sup> Those columns are:

|          |                                                                                                                                                |
|----------|------------------------------------------------------------------------------------------------------------------------------------------------|
| SNP      | single-nucleotide polymorphism; rs identifier                                                                                                  |
| CHR      | chromosome                                                                                                                                     |
| BP       | basepair (hg19)                                                                                                                                |
| Genes    | Closest gene(s)                                                                                                                                |
| Location | Where the SNP resides relative to the listed gene                                                                                              |
| Risk     | Risk allele                                                                                                                                    |
| Ref      | Reference allele                                                                                                                               |
| RAF      | Risk allele frequency                                                                                                                          |
| OR       | Odds ratio                                                                                                                                     |
| CI95_1   | 95% confidence interval for the odds ratio (lower bound)                                                                                       |
| CI95_2   | 95% confidence interval for the odds ratio (upper bound)                                                                                       |
| Pval     | Association p-value                                                                                                                            |
| Mean_imp | Imputation quality                                                                                                                             |
| Analysis | The analysis the variant or gene was discovered in (ExWAS, expression QTL analysis; Meta, meta-analysis; RVAS, rare variant association study) |

The remaining columns provided are data points extracted from the atrial fibrillation GWAS in SiGN. They are:

|                |                                                                                                      |
|----------------|------------------------------------------------------------------------------------------------------|
| SiGN_RAF       | Risk allele frequency in SiGN                                                                        |
| SiGN_INFO      | Imputation quality (info score) in SiGN                                                              |
| SiGN_BOLT_BETA | Beta of the SNP taken from BOLT-LMM; note that this is a beta that results from a linear mixed model |
| SiGN_LIAB_BETA | The beta, converted to the liability scale                                                           |
| SiGN_OR        | Odds ratio in SiGN                                                                                   |
| SiGN_SE        | Standard error of SiGN_BOLT_BETA                                                                     |
| SiGN_P_BOLT    | P-value from BOLT-LMM (for the infinitesimal model only)                                             |

**Supplementary Table 3 | Heritability calculations in atrial fibrillation and ischemic stroke subtypes.** (a) We calculated the SNP-based heritability ( $h_g^2$ ) of atrial fibrillation, all ischemic stroke, and the stroke subtypes using GCTA<sup>2</sup>. All SNPs used had minor allele frequency > 1% and imputation quality > 0.8 (for imputed SNPs). Imputed SNPs were converted to best-guess genotypes. We assumed a trait prevalence of 1% for all phenotypes and tested the robustness of  $h_g^2$  estimates to SNPs included in the GRM by using four different GRMs: (i) genotyped only; (ii) genotyped, pruned, and filtered (see **Supplemental Methods**); (iii) imputed; and (iv) imputed, pruned, and filtered. (b) We performed the exact same analysis but using BOLT-LMM to estimate  $h_g^2$ . BOLT-LMM estimates were converted to the liability scale (see **Supplemental Methods**).

Geno, genotyped; SE, standard error; CCSc, CCS Causative; CCSp, CCS Phenotypic

a.  $h_g^2$  estimates in GCTA

| Subtype                      | Subtyping system    | Cases  | Geno $h_g^2$ (SE) | Geno, filtered $h_g^2$ (SE) | Imputed $h_g^2$ (SE) | Imputed, filtered $h_g^2$ (SE) |
|------------------------------|---------------------|--------|-------------------|-----------------------------|----------------------|--------------------------------|
| Large artery atherosclerosis | CCSc                | 2,385  | 0.115 (0.020)     | 0.124 (0.020)               | 0.127 (0.020)        | 0.160 (0.024)                  |
|                              | CCSp                | 2,449  | 0.117 (0.020)     | 0.113 (0.019)               | 0.140 (0.020)        | 0.149 (0.023)                  |
|                              | TOAST               | 2,318  | 0.139 (0.021)     | 0.135 (0.021)               | 0.169 (0.022)        | 0.282 (0.025)                  |
| Cardio-embolic               | CCSc                | 3,000  | 0.166 (0.017)     | 0.139 (0.016)               | 0.172 (0.017)        | 0.219 (0.019)                  |
|                              | CCSp                | 3,608  | 0.145 (0.014)     | 0.125 (0.014)               | 0.136 (0.014)        | 0.181 (0.016)                  |
|                              | TOAST               | 3,333  | 0.139 (0.015)     | 0.115 (0.015)               | 0.156 (0.016)        | 0.224 (0.018)                  |
| Small artery occlusion       | CCSc                | 2,262  | 0.118 (0.021)     | 0.114 (0.020)               | 0.121 (0.021)        | 0.144 (0.024)                  |
|                              | CCSp                | 2,419  | 0.106 (0.020)     | 0.097 (0.019)               | 0.114 (0.019)        | 0.122 (0.022)                  |
|                              | TOAST               | 2,631  | 0.122 (0.019)     | 0.120 (0.018)               | 0.135 (0.019)        | 0.162 (0.021)                  |
| Undetermined                 | CCSc                | 4,574  | 0.087 (0.012)     | 0.077 (0.011)               | 0.120 (0.012)        | 0.168 (0.014)                  |
|                              | CCSc (INCUNC)       | 2,280  | 0.123 (0.021)     | 0.118 (0.021)               | 0.205 (0.022)        | 0.284 (0.024)                  |
|                              | CCSc (CRYPTCE)      | 2,294  | 0.092 (0.021)     | 0.086 (0.020)               | 0.109 (0.021)        | 0.179 (0.025)                  |
|                              | CCSp                | 1,096  | 0.132 (0.042)     | 0.091 (0.040)               | 0.159 (0.041)        | 0.249 (0.050)                  |
|                              | TOAST               | 3,479  | 0.096 (0.015)     | 0.089 (0.014)               | 0.141 (0.015)        | 0.214 (0.017)                  |
| --                           | All stroke          | 13,390 | 0.069 (0.005)     | 0.059 (0.005)               | 0.082 (0.005)        | 0.107 (0.006)                  |
| --                           | Atrial fibrillation | 3,190  | 0.182 (0.016)     | 0.156 (0.019)               | 0.178 (0.016)        | 0.228 (0.019)                  |

*b.  $h_g^2$  estimates in BOLT-LMM*

| Subtype                      | Subtyping system    | Geno $h_g^2$ (SE) | Geno, filtered $h_g^2$ (SE) | Imputed $h_g^2$ (SE) | Imputed, filtered $h_g^2$ (SE) | Imputed, filtered $h_g^2$ (SE) |
|------------------------------|---------------------|-------------------|-----------------------------|----------------------|--------------------------------|--------------------------------|
| Large artery atherosclerosis | CCSc                | 2,385             | 0.116 (0.020)               | 0.120 (0.020)        | 0.120 (0.020)                  | 0.155 (0.024)                  |
|                              | CCSp                | 2,449             | 0.121 (0.020)               | 0.119 (0.019)        | 0.142 (0.020)                  | 0.152 (0.023)                  |
|                              | TOAST               | 2,318             | 0.130 (0.021)               | 0.121 (0.020)        | 0.145 (0.021)                  | 0.241 (0.025)                  |
| Cardio-embolic               | CCSc                | 3,000             | 0.157 (0.017)               | 0.129 (0.016)        | 0.159 (0.017)                  | 0.195 (0.019)                  |
|                              | CCSp                | 3,608             | 0.138 (0.014)               | 0.117 (0.014)        | 0.127 (0.014)                  | 0.164 (0.016)                  |
|                              | TOAST               | 3,333             | 0.131 (0.015)               | 0.108 (0.015)        | 0.144 (0.015)                  | 0.210 (0.018)                  |
| Small artery occlusion       | CCSc                | 2,262             | 0.147 (0.021)               | 0.151 (0.020)        | 0.179 (0.022)                  | 0.230 (0.026)                  |
|                              | CCSp                | 2,419             | 0.133 (0.020)               | 0.127 (0.019)        | 0.161 (0.020)                  | 0.196 (0.024)                  |
|                              | TOAST               | 2,631             | 0.142 (0.019)               | 0.142 (0.018)        | 0.168 (0.019)                  | 0.211 (0.022)                  |
| Undetermined                 | CCSc                | 4,574             | 0.090 (0.012)               | 0.086 (0.011)        | 0.130 (0.012)                  | 0.182 (0.014)                  |
|                              | CCSc (INCUNC)       | 2,280             | 0.133 (0.021)               | 0.118 (0.021)        | 0.128 (0.021)                  | 0.282 (0.024)                  |
|                              | CCSc (CRYPTCE)      | 2,294             | 0.112 (0.021)               | 0.112 (0.021)        | 0.143 (0.021)                  | 0.237 (0.026)                  |
|                              | CCSp                | 1,096             | 0.159 (0.042)               | 0.136 (0.041)        | 0.213 (0.042)                  | 0.341 (0.052)                  |
|                              | TOAST               | 3,479             | 0.101 (0.015)               | 0.099 (0.014)        | 0.153 (0.015)                  | 0.228 (0.017)                  |
| --                           | All stroke          | 13,390            | 0.169 (0.012)               | 0.059 (0.005)        | 0.084 (0.005)                  | 0.114 (0.006)                  |
| --                           | Atrial fibrillation | 3,190             | 0.169 (0.016)               | 0.140 (0.015)        | 0.156 (0.016)                  | 0.200 (0.018)                  |

**Supplementary Table 4 | Genetic correlations between atrial fibrillation and ischemic stroke subtypes.** To estimate genetic correlation between atrial fibrillation and ischemic stroke subtypes, we calculated Pearson's  $r$  between SNP z-scores in the Atrial Fibrillation Genetics (AFGen) GWAS of atrial fibrillation and in GWAS of ischemic stroke subtypes and atrial fibrillation performed here in the SiGN data. The correlation calculations are provided in this table, which is split into two parts and is available to download in text format here:

Part A: correlations calculated across all genome-wide SNPs

<https://github.com/saralpulit/Afib-Stroke-Overlap/blob/master/SuppTable4.partA.SiGN.AFGen.trait.correlations.txt>

Part B: correlations calculated across all genome-wide SNPs except those  $\pm 2\text{Mb}$  from the PITX2 and ZFH3 index SNPs provided in Supplementary Table 2

<https://github.com/saralpulit/Afib-Stroke-Overlap/blob/master/SuppTable4.partB.SiGN.AFGen.trait.correlations.drop-pitx2-zfhx3.txt>

The headers of the two files are exactly the same:

| <b>Column</b>    | <b>Definition</b>                                                                   |
|------------------|-------------------------------------------------------------------------------------|
| Z.threshold      | Z-score threshold used to subset AFGen SNPs                                         |
| EduYrs.Z         | Correlation with z-scores from educational attainment GWAS                          |
| afib.broad.Z     | Correlation with z-scores from atrial fibrillation (broadly defined phenotype) GWAS |
| allstroke.Z      | Correlation with z-scores from all stroke GWAS                                      |
| CCScCEmajor.Z    | Correlation with z-scores from CCSc CE GWAS                                         |
| CCScCRYPTCE.Z    | Correlation with z-scores from CCSc CRYPTCE GWAS                                    |
| CCScINCUNC.Z     | Correlation with z-scores from CCSc INCUNC GWAS                                     |
| CCScLAA.Z        | Correlation with z-scores from CCSc LAA GWAS                                        |
| CCScSAO.Z        | Correlation with z-scores from CCSc SAO GWAS                                        |
| CCScUNDETER.Z    | Correlation with z-scores from CCSc UNDETER GWAS                                    |
| CCSpCEmajincl.Z  | Correlation with z-scores from CCSp CE GWAS                                         |
| CCSpCryptoincl.Z | Correlation with z-scores from CCSp Cryptogenic GWAS                                |
| CCSpLAAmajincl.Z | Correlation with z-scores from CCSp LAA GWAS                                        |
| CCSpSAOmajincl.Z | Correlation with z-scores from CCSp SAO GWAS                                        |
| toastCE.Z        | Correlation with z-scores from TOAST CE GWAS                                        |
| toastLAA.Z       | Correlation with z-scores from TOAST LAA GWAS                                       |
| toastSAO.Z       | Correlation with z-scores from TOAST SAO GWAS                                       |
| toastUNDETER.Z   | Correlation with z-scores from TOAST UNDETER GWAS                                   |

CCSc, CCS Causative subtyping system; CCSp, CCS Phenotypic subtyping system; TOAST, TOAST subtyping system; CE, cardioembolic stroke; LAA, large artery atherosclerosis; SAO, small artery occlusion; UNDETER, undetermined; INCUNC, incomplete/unclassified; CRYPTCE, cryptogenic and CE minor.



**Supplementary Table 5 | Association between the atrial fibrillation genetic risk score and ischemic stroke subtypes.** We tested the association between a genetic risk score (GRS) constructed from atrial fibrillation-associated SNPs and all stroke subtypes. The results of those association tests are shown here. We used two groups of controls: all available controls (N = 28,026) and all controls that were free of atrial fibrillation (AF, N = 3,860). All analyses were adjusted for sex and principal components (PCs). Regression analyses were optionally adjusted for clinical covariates (age, cardiovascular disease, type 2 diabetes status, smoking status, and hypertension).

Significant results ( $p = 0.0062$ , Bonferroni-corrected for four subtype groups and two independent subtyping classifications -- CCS and TOAST -- are bolded).

SE, standard error; CCSc, CCS Causative; CCSp, CCS Phenotypic.

*Large artery atherosclerosis (LAA):*

| Case definition | Control definition | Cases | Controls | Logistic regression, adjusted for PCs and sex |       |         | Logistic regression, adjusted for PCs, sex, and clinical covariates |       |         |
|-----------------|--------------------|-------|----------|-----------------------------------------------|-------|---------|---------------------------------------------------------------------|-------|---------|
|                 |                    |       |          | Beta                                          | SE    | P-value | Beta                                                                | SE    | P-value |
| CCSc LAA        | Non-AF controls    | 2,385 | 3,860    | 0.008                                         | 0.015 | 0.600   | 0.002                                                               | 0.018 | 0.929   |
| CCSc LAA        | All controls       | 2,385 | 28,026   | -0.002                                        | 0.012 | 0.885   | -0.004                                                              | 0.013 | 0.786   |
| CCSp LAA        | Non-AF controls    | 2,449 | 3,860    | 0.016                                         | 0.016 | 0.315   | 0.010                                                               | 0.018 | 0.570   |
| CCSp LAA        | All controls       | 2,449 | 28,026   | 0.004                                         | 0.011 | 0.694   | 0.002                                                               | 0.013 | 0.850   |
| TOAST LAA       | Non-AF controls    | 2,318 | 3,860    | 0.010                                         | 0.016 | 0.528   | 0.000                                                               | 0.018 | 0.980   |
| TOAST LAA       | All controls       | 2,318 | 28,026   | -0.006                                        | 0.012 | 0.594   | -0.008                                                              | 0.014 | 0.550   |

*Cardioembolic stroke (CE):*

| Case definition | Control definition | Cases | Controls | Logistic regression, adjusted for PCs and sex |       |                 | Logistic regression, adjusted for PCs, sex, and clinical covariates |       |                 |
|-----------------|--------------------|-------|----------|-----------------------------------------------|-------|-----------------|---------------------------------------------------------------------|-------|-----------------|
|                 |                    |       |          | Beta                                          | SE    | P-value         | Beta                                                                | SE    | P-value         |
| CCSc CE         | Non-AF controls    | 3,000 | 3,860    | 0.187                                         | 0.014 | <b>1.59E-42</b> | 0.218                                                               | 0.018 | <b>1.40E-34</b> |
| CCSc CE         | All controls       | 3,000 | 28,026   | 0.169                                         | 0.010 | <b>1.01E-65</b> | 0.173                                                               | 0.012 | <b>1.45E-48</b> |
| CCSp CE         | Non-AF controls    | 3,608 | 3,860    | 0.178                                         | 0.013 | <b>6.98E-43</b> | 0.203                                                               | 0.017 | <b>8.34E-34</b> |
| CCSp CE         | All controls       | 3,608 | 28,026   | 0.161                                         | 0.009 | <b>2.43E-70</b> | 0.163                                                               | 0.011 | <b>1.05E-49</b> |
| TOAST CE        | Non-AF controls    | 3,333 | 3,860    | 0.171                                         | 0.013 | <b>3.17E-37</b> | 0.172                                                               | 0.015 | <b>3.22E-29</b> |
| TOAST CE        | All controls       | 3,333 | 28,026   | 0.149                                         | 0.009 | <b>3.00E-56</b> | 0.146                                                               | 0.011 | <b>4.43E-41</b> |

*Small artery occlusion (SAO):*

| Case definition | Control definition | Cases | Controls | Logistic regression, adjusted for PCs and sex |       |         | Logistic regression, adjusted for PCs, sex, and clinical covariates |       |         |
|-----------------|--------------------|-------|----------|-----------------------------------------------|-------|---------|---------------------------------------------------------------------|-------|---------|
|                 |                    |       |          | Beta                                          | SE    | P-value | Beta                                                                | SE    | P-value |
| CCSc SAO        | Non-AF controls    | 2,262 | 3,860    | 0.023                                         | 0.017 | 0.170   | 0.026                                                               | 0.019 | 0.163   |
| CCSc SAO        | All controls       | 2,262 | 28,026   | 0.002                                         | 0.012 | 0.842   | 0.006                                                               | 0.013 | 0.660   |
| CCSp SAO        | Non-AF controls    | 2,419 | 3,860    | 0.025                                         | 0.016 | 0.124   | 0.029                                                               | 0.018 | 0.109   |
| CCSp SAO        | All controls       | 2,419 | 28,026   | 0.003                                         | 0.012 | 0.787   | 0.007                                                               | 0.013 | 0.602   |
| TOAST SAO       | Non-AF controls    | 2,631 | 3,860    | 0.021                                         | 0.016 | 0.209   | 0.019                                                               | 0.018 | 0.289   |
| TOAST SAO       | All controls       | 2,631 | 28,026   | 0.001                                         | 0.011 | 0.902   | 0.003                                                               | 0.013 | 0.826   |

*Undetermined strokes:*

| Case definition | Control definition | Cases | Controls | Logistic regression, adjusted for PCs and sex |       |              | Logistic regression, adjusted for PCs, sex, and clinical covariates |       |         |
|-----------------|--------------------|-------|----------|-----------------------------------------------|-------|--------------|---------------------------------------------------------------------|-------|---------|
|                 |                    |       |          | Beta                                          | SE    | P-value      | Beta                                                                | SE    | P-value |
| CCSc UNDETER    | Non-AF controls    | 4,574 | 3,860    | 0.036                                         | 0.013 | <b>0.004</b> | 0.031                                                               | 0.014 | 0.022   |
| CCSc UNDETER    | All controls       | 4,574 | 28,026   | 0.021                                         | 0.009 | 0.013        | 0.021                                                               | 0.010 | 0.030   |
| CCSc INCUNC     | Non-AF controls    | 2,280 | 3,860    | 0.046                                         | 0.016 | <b>0.003</b> | 0.045                                                               | 0.017 | 0.010   |
| CCSc INCUNC     | All controls       | 2,280 | 28,026   | 0.028                                         | 0.012 | 0.015        | 0.029                                                               | 0.013 | 0.025   |
| CCSc CRYPTCE    | Non-AF controls    | 2,294 | 3,860    | 0.030                                         | 0.016 | 0.051        | 0.026                                                               | 0.017 | 0.124   |
| CCSc CRYPTCE    | All controls       | 2,294 | 28,026   | 0.015                                         | 0.012 | 0.212        | 0.017                                                               | 0.013 | 0.192   |
| CCSp Crypto     | Non-AF controls    | 1,096 | 3,860    | 0.035                                         | 0.020 | 0.090        | 0.029                                                               | 0.022 | 0.195   |
| CCSp Crypto     | All controls       | 1,096 | 28,026   | 0.019                                         | 0.016 | 0.258        | 0.021                                                               | 0.018 | 0.245   |
| TOAST UNDETER   | Non-AF controls    | 3,479 | 3,860    | 0.033                                         | 0.013 | 0.015        | 0.028                                                               | 0.014 | 0.055   |
| TOAST UNDETER   | All controls       | 3,479 | 28,026   | 0.021                                         | 0.010 | 0.027        | 0.022                                                               | 0.011 | 0.042   |

UNDETER, undetermined; INCUNC, incomplete and unclassified; CRYPTCE, cryptogenic and CE minor; Crypto, cryptogenic

**Supplementary Table 6 | Sensitivity analysis for the atrial fibrillation genetic risk score.** As a sensitivity analysis for the genetic risk score (GRS), we constructed 3 additional GRSs, including SNPs +/- 25kb, +/- 50kb, and +/- 100kb from the SNPs included in the original score. All scores remain highly significant when tested for association with cardioembolic stroke (using a logistic regression model). P-values after additionally adjusting for clinical covariates are also shown. Clinical covariates: age, cardiovascular disease, type 2 diabetes status, smoking status, and hypertension.

PCs, principal components; MAF, minor allele frequency; INFO, imputation (info) score.

| GRS SNPs                | Filters                | Total SNPs | GRS p-value                  |                                                   |
|-------------------------|------------------------|------------|------------------------------|---------------------------------------------------|
|                         |                        |            | <i>Adjusted for PCs, sex</i> | <i>Adjusted for PCs, sex, clinical covariates</i> |
| Original SNPs           | MAF > 1%<br>Info > 0.8 | 975        | $1.01 \times 10^{-65}$       | $1.44 \times 10^{-48}$                            |
| Original SNPs +/- 25kb  | MAF > 1%<br>Info > 0.8 | 146,631    | $9.13 \times 10^{-50}$       | $1.32 \times 10^{-37}$                            |
| Original SNPs +/- 50kb  | MAF > 1%<br>Info > 0.8 | 258,870    | $5.76 \times 10^{-48}$       | $1.40 \times 10^{-36}$                            |
| Original SNPs +/- 100kb | MAF > 1%<br>Info > 0.8 | 462,146    | $4.47 \times 10^{-44}$       | $1.77 \times 10^{-32}$                            |

**Supplementary Table 7 | Clinical covariates available in the SiGN data.** We adjusted our analyses of a genetic risk score for a series of clinical covariates that are associated with atrial fibrillation. Summary-statistics on these covariates are shown below for those samples classified as (a) cardioembolic stroke or (b) undetermined stroke. The number of samples with missing data are provided in parentheses where relevant.

### *Cardioembolic*

| Phenotype                   | CCS Causative | CCS Phenotypic | TOAST       |
|-----------------------------|---------------|----------------|-------------|
| Female                      | 1,588         | 1,859          | 1,618       |
| Male                        | 1,247         | 1,541          | 1,520       |
| Age: mean (sd)              | 74.7 (12.4)   | 74.5 (12.3)    | 71.0 (15.1) |
| Hypertensive (missing)      | 2,195 (18)    | 2,665 (21)     | 2,272 (16)  |
| Diabetes mellitus (missing) | 763 (26)      | 950 (29)       | 799 (8)     |
| CAD (missing)               | 989 (64)      | 1206 (83)      | 911 (119)   |
| Smoking                     |               |                |             |
| Current                     | 379           | 468            | 513         |
| Former                      | 694           | 865            | 776         |
| Never                       | 1,737         | 2,055          | 1,905       |
| Total                       | 3,000         | 3,608          | 3,333       |

### *Undetermined*

| Phenotype                   | CCS Causative | CCS Causative | CCS Causative | CCS Phenotypic | TOAST       |
|-----------------------------|---------------|---------------|---------------|----------------|-------------|
| Female                      | 1,880         | 1,024         | 856           | 420            | 1,445       |
| Male                        | 2,151         | 1,014         | 1,137         | 543            | 1,635       |
| Age: mean (sd)              | 63.9 (15.4)   | 67.7 (13.9)   | 69.0 (15.9)   | 58.9 (15.7)    | 63.7 (16.1) |
| Hypertensive (missing)      | 2,833 (23)    | 1,512 (14)    | 1,321 (9)     | 612 (3)        | 2,110 (29)  |
| Diabetes mellitus (missing) | 958 (26)      | 513 (14)      | 445 (12)      | 202 (4)        | 708 (25)    |
| CAD (missing)               | 739 (169)     | 421 (86)      | 318 (83)      | 115 (46)       | 573 (100)   |
| Smoking                     |               |               |               |                |             |
| Current                     | 1,090         | 582           | 508           | 239            | 813         |
| Former                      | 1,050         | 516           | 534           | 235            | 772         |
| Never                       | 2,202         | 1,081         | 1,121         | 548            | 1,711       |
| Total                       | 4,574         | 2,280         | 2,294         | 1,096          | 3,479       |

**Supplementary Table 8: Variance explained by the atrial fibrillation genetic risk score in cardioembolic stroke.**

To determine the variance explained by the atrial fibrillation genetic risk score (GRS) in cardioembolic stroke, we constructed a model in BOLT-LMM that consisted of two variance components: (1) a variance component made up of SNPs for the genetic relationship matrix, and (2) a variance component made up of SNPs from the GRS. After computing the estimated variance explained for each component in BOLT-LMM, we converted the estimate to the liability score. Below is variance explained for each of the cardioembolic stroke phenotypes as determined by the three subtyping systems available in SiGN: CCS Causative, CCS Phenotypic, and TOAST. Standard errors of each estimate appear in parentheses. Explained variance is shown for a GRS including the *PITX2* (chromosome 4) and *ZFHX3* (chromosome 16) loci, as well as excluding  $\pm 2\text{Mb}$  around these loci (see <https://github.com/UMCUGenetics/Afib-Stroke-Overlap> for lists of SNPs that fall in these regions). Because a large number of SNPs is needed to construct a variance component to calculate variance explained, we performed the calculation using the atrial fibrillation GRS including SNPs  $\pm 100\text{kb}$  from the original GRS SNPs, and then pruning SNPs a linkage disequilibrium of 0.2.

CE, cardioembolic; GRS, genetic risk score; AF, atrial fibrillation

| Subtyping System                              | $h_g^2$ CE stroke | $h_g^2$ atrial fibrillation GRS $\pm 100\text{kb}$ | Proportion of CE $h_g^2$ explained by AF GRS |
|-----------------------------------------------|-------------------|----------------------------------------------------|----------------------------------------------|
| <i>GRS including the PITX2 and ZFHX3 loci</i> |                   |                                                    |                                              |
| CCSc                                          | 0.195 (0.019)     | 0.045 (0.010)                                      | 23.1%                                        |
| CCSp                                          | 0.164 (0.016)     | 0.040 (0.008)                                      | 24.4%                                        |
| TOAST                                         | 0.210 (0.018)     | 0.051 (0.01)                                       | 24.3%                                        |
| <i>GRS excluding the PITX2 and ZFHX3 loci</i> |                   |                                                    |                                              |
| CCSc                                          | 0.195 (0.019)     | 0.037 (0.010)                                      | 19.0%                                        |
| CCSp                                          | 0.164 (0.016)     | 0.032 (0.008)                                      | 19.5%                                        |
| TOAST                                         | 0.210 (0.018)     | 0.044 (0.009)                                      | 21.0%                                        |

## Supplementary Figures

**Supplementary Figure 1 | Genome-wide association study (GWAS) of atrial fibrillation in SiGN.** (A) We performed a GWAS of 3,190 cases with atrial fibrillation, or paroxysmal atrial fibrillation, as well as other diagnoses suggestive of underlying atrial fibrillation, including left atrial thrombus, sick sinus syndrome, and atrial flutter. We additionally included 28,026 referents. We used a linear mixed model and adjusted the model for principal components and sex. The majority of atrial fibrillation risk loci identified through previous GWAS efforts were identified here at nominal significance or better (see **Supplementary Table 2**). The Manhattan plot only shows QC-passing SNPs with minor allele frequency > 1% and imputation quality score > 0.8. (B) Quantile-quantile (QQ) plot indicating SNPs stratified by minor allele frequency and the corresponding genomic inflation factor ( $\lambda$ ) for each stratum. (C) QQ plot showing SNPs stratified by imputation quality and the corresponding  $\lambda$  for each stratum. Figures D-F are identical to those of A-C, but for the analysis performed in atrial fibrillation cases only ( $N = 1,751$ ). We performed this as an internal sensitivity analysis only, to ensure that more broadly defining the atrial fibrillation phenotype was not introducing additional phenotypic noise.

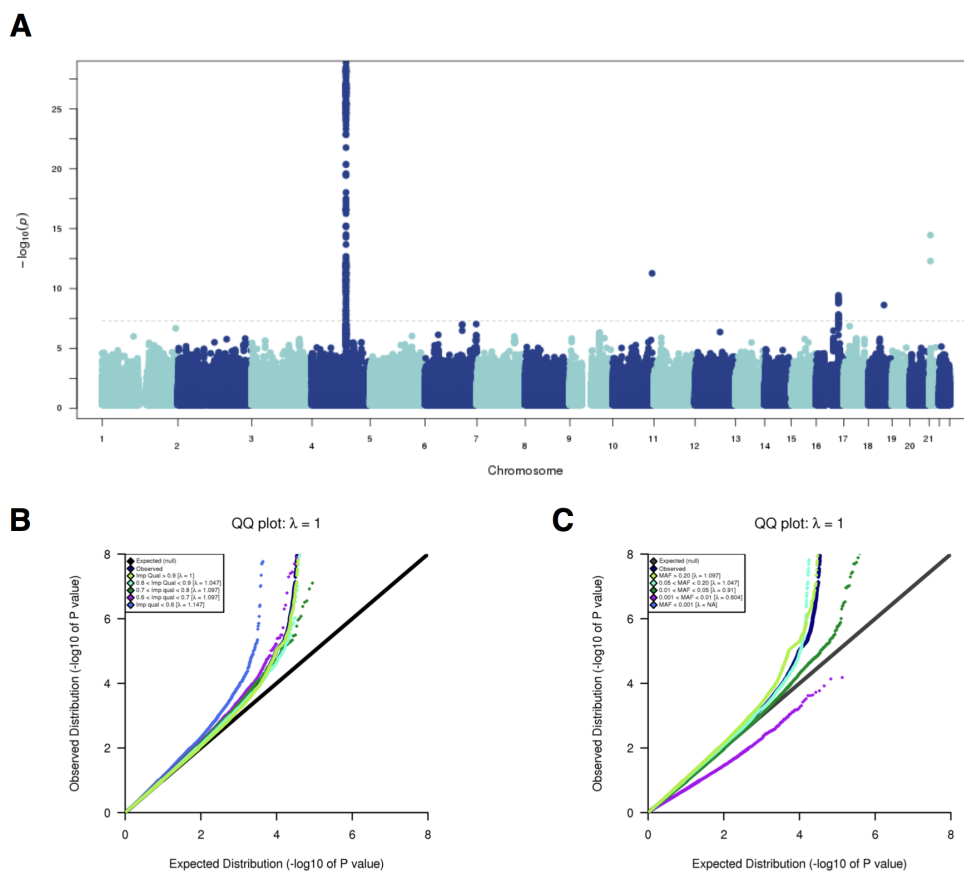

**D**

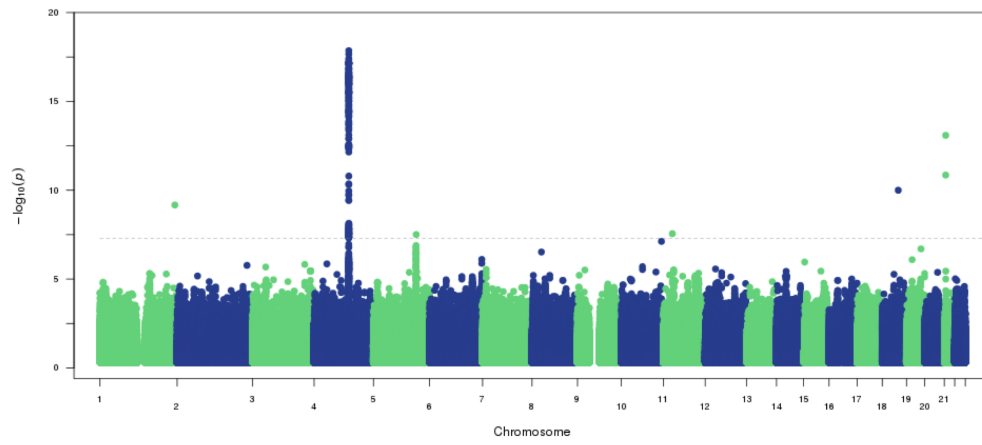

**E**

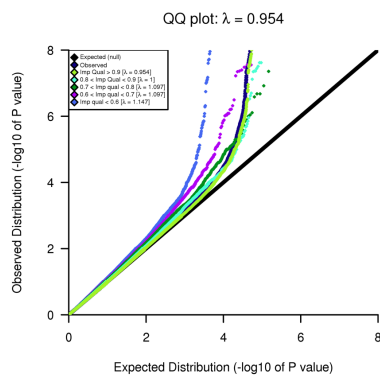

**F**

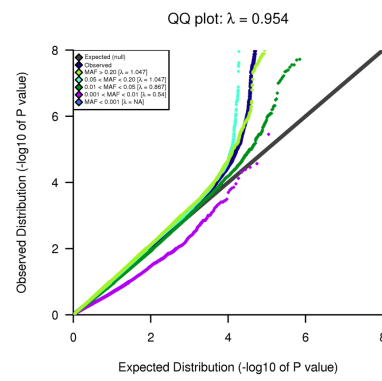

**Supplementary Figure 2 | Heritability of ischemic stroke, its subtypes, and atrial fibrillation.** We computed the SNP-based heritability of all stroke, all stroke subtypes, and atrial fibrillation using BOLT-LMM (top row) and GCTA (bottom row). All SNPs used for analysis had a minor allele frequency > 1% and imputation quality > 0.8 (for imputed SNPs). Imputed SNPs were converted to best-guess genotypes. We assumed a trait prevalence of 1% for all phenotypes and tested the robustness of  $\hat{h}^2$  estimates to SNPs included in the GRM by using four different GRMs: (a) genotyped SNPs only; (b) genotyped, pruned, and filtered (see **Supplemental Methods**); (c) imputed; and (d) imputed, pruned, and filtered. We converted the imputed SNPs to hard-call genotypes before performing heritability analyses. Estimates are shown below, including error bars. The underlying data for these figures are provided in **Supplementary Table 3**.

LAA, large artery atherosclerosis; CE, cardioembolic stroke; SAO, small artery occlusion; UNDETER, undetermined; INCUNC, incomplete/unclassified; CRYPTCE, cryptogenic and CE minor; Cryptoincl, cryptogenic; CCSc, CCS Causative subtyping system; CCSp, CCS Phenotypic subtyping system; TOAST, TOAST subtyping system.

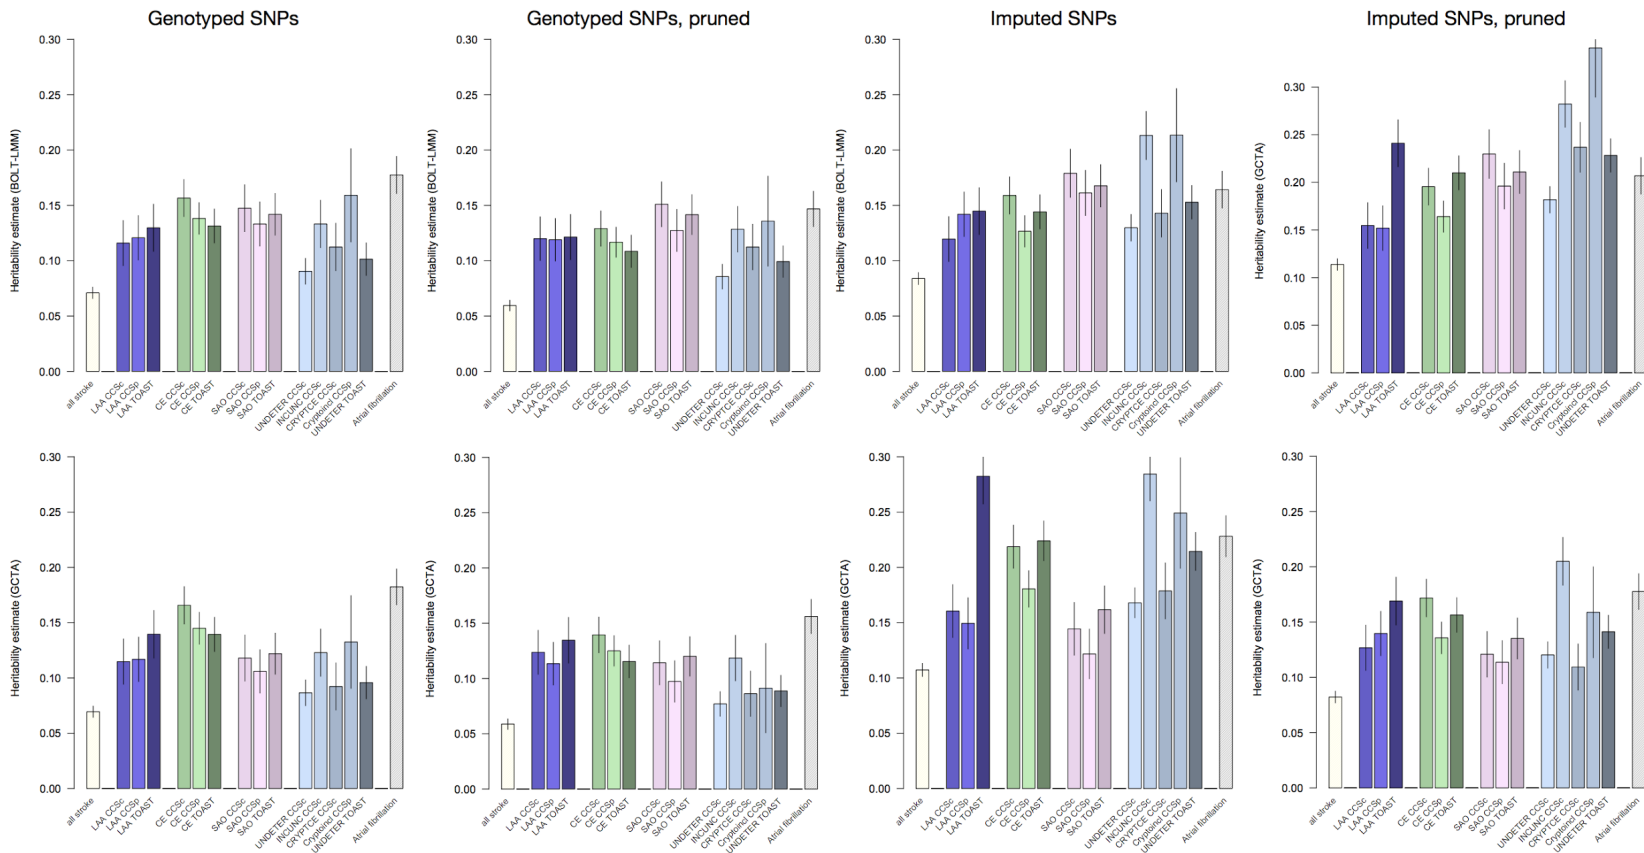



**Supplementary Figure 3 | Comparison of heritability estimates from BOLT-LMM and GCTA.** We computed the heritability of all stroke, all stroke subtypes, and atrial fibrillation using BOLT-LMM and GCTA, as shown in **Supplementary Figure 2**. Below, you will find a comparison of the two methods, with BOLT-REML on the x-axis and GCTA estimates on the y-axis. Error bars are shown for the respective estimates.

AF, atrial fibrillation; CE, cardioembolic stroke; LAA, large artery atherosclerosis; SAO, small artery occlusion; UNDETER, undetermined; INCUNC, incomplete/unclassified; CRYPTCE, cryptogenic/CE minor; c, CCS Causative; p, CCS Phenotypic; t, TOAST.

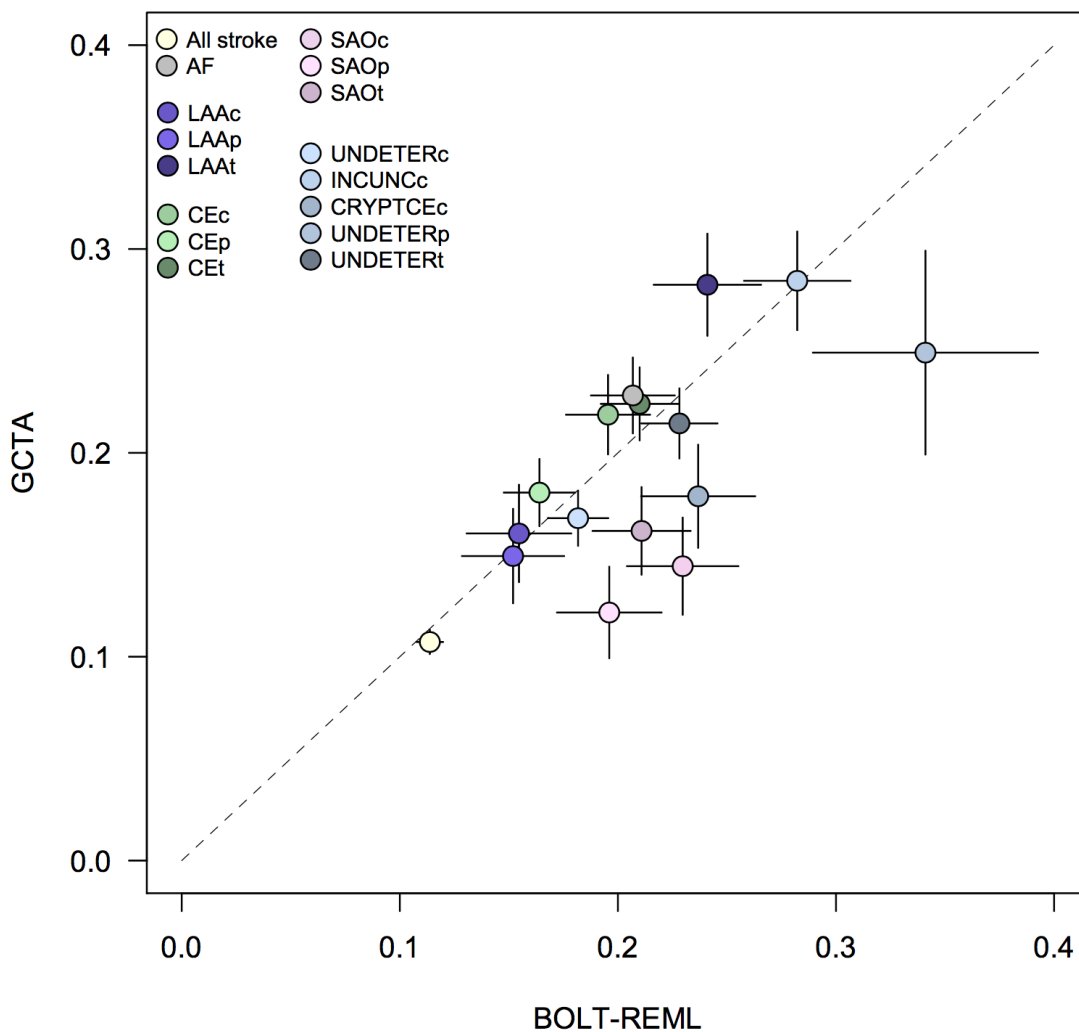

### Supplementary Figure 4 | Genetic correlations between atrial fibrillation and ischemic stroke subtypes.

To estimate genetic correlation between atrial fibrillation and ischemic stroke subtypes, we calculated Pearson's  $r$  between SNP z-scores in the AFGen GWAS of atrial fibrillation and in GWAS of ischemic stroke subtypes and atrial fibrillation performed here in the SiGN data. Here, we present data identical to that shown in Figure 2 of the main manuscript, but removing  $\pm 2\text{Mb}$  around the two most significant loci discovered in atrial fibrillation and cardioembolic stroke: the region around *PITX2* (chromosome 4) and the region around *ZFHX3* (chromosome 16). (a) Genome wide, atrial fibrillation in AFGen and in SiGN correlate with increasing strength as the z-score in AFGen increases. Educational attainment is included here as a null comparator. (b) Genetic signal in cardioembolic stroke also correlates strongly with atrial fibrillation genetic signal in AFGen, but we do not observe correlation between atrial fibrillation and the other primary stroke subtypes. (c) Removing the *PITX2* and *ZFHX3* regions leaves only somewhat modest correlation between the incomplete/unclassified undetermined subtype and atrial fibrillation. Panels (d-f) show underlying data.

Correlations restricted to those SNPs used in the genetic risk score for atrial fibrillation were: AFGen vs atrial fibrillation in SiGN,  $r = 0.78$ ; AFGen vs. cardioembolic stroke in SiGN,  $r = 0.75$ .

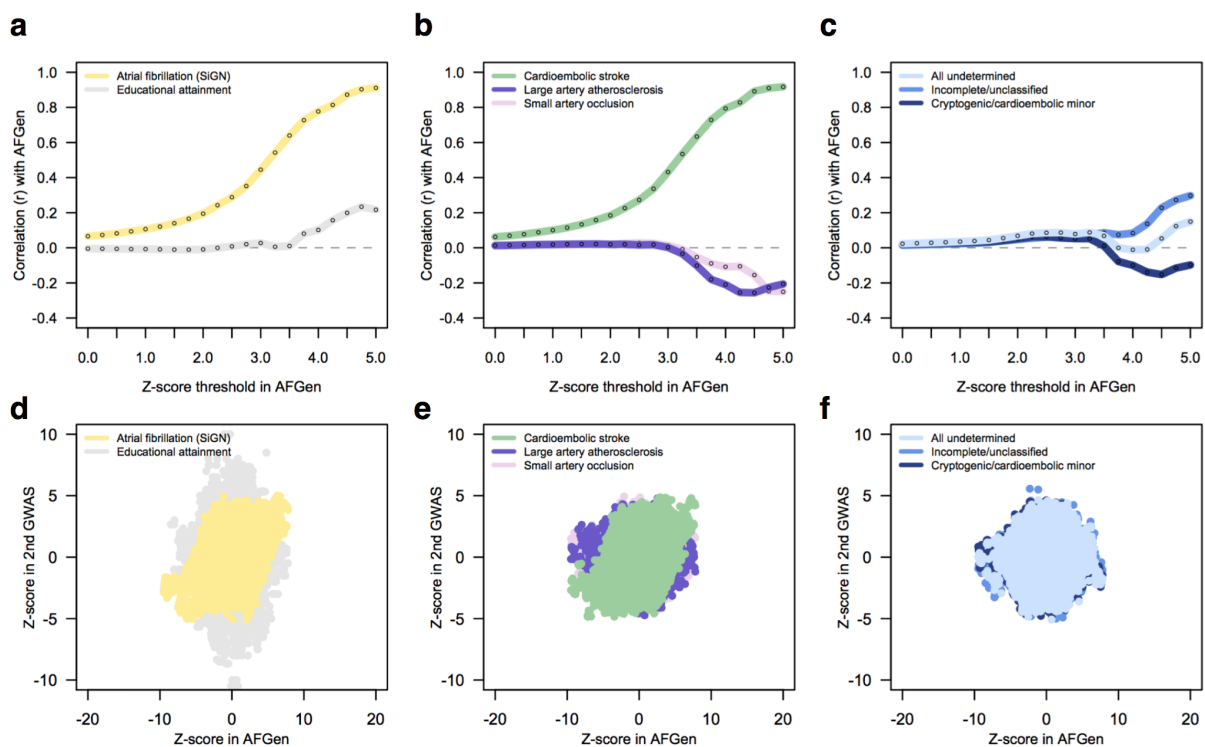

**Supplementary Figure 5 | Genetic correlation and phenotypic correlation of atrial fibrillation and stroke subtypes in SiGN.** (a) Using genome-wide SNP effects extracted from GWAS of atrial fibrillation, all stroke, and stroke subtypes, we calculated the Pearson's correlation ( $r$ ) between each pair of available phenotypes (blue indicates strong negative correlation; orange indicates strong positive correlation). Here, we show all correlations. Correlations are indicated by circle size in the upper half of the square, and the exact correlation values are shown in the lower half of the square.

CE, cardioembolic stroke; LAA, large artery atherosclerosis; SAO, small artery occlusion; UNDETER, undetermined; INCUNC, incomplete/unclassified; CRYPTCE, cryptogenic and CE minor; Cryptoincl, cryptogenic; CCSc, CCS Causative subtyping system; CCSp, CCS Phenotypic subtyping system; TOAST, TOAST subtyping system.

**a.**

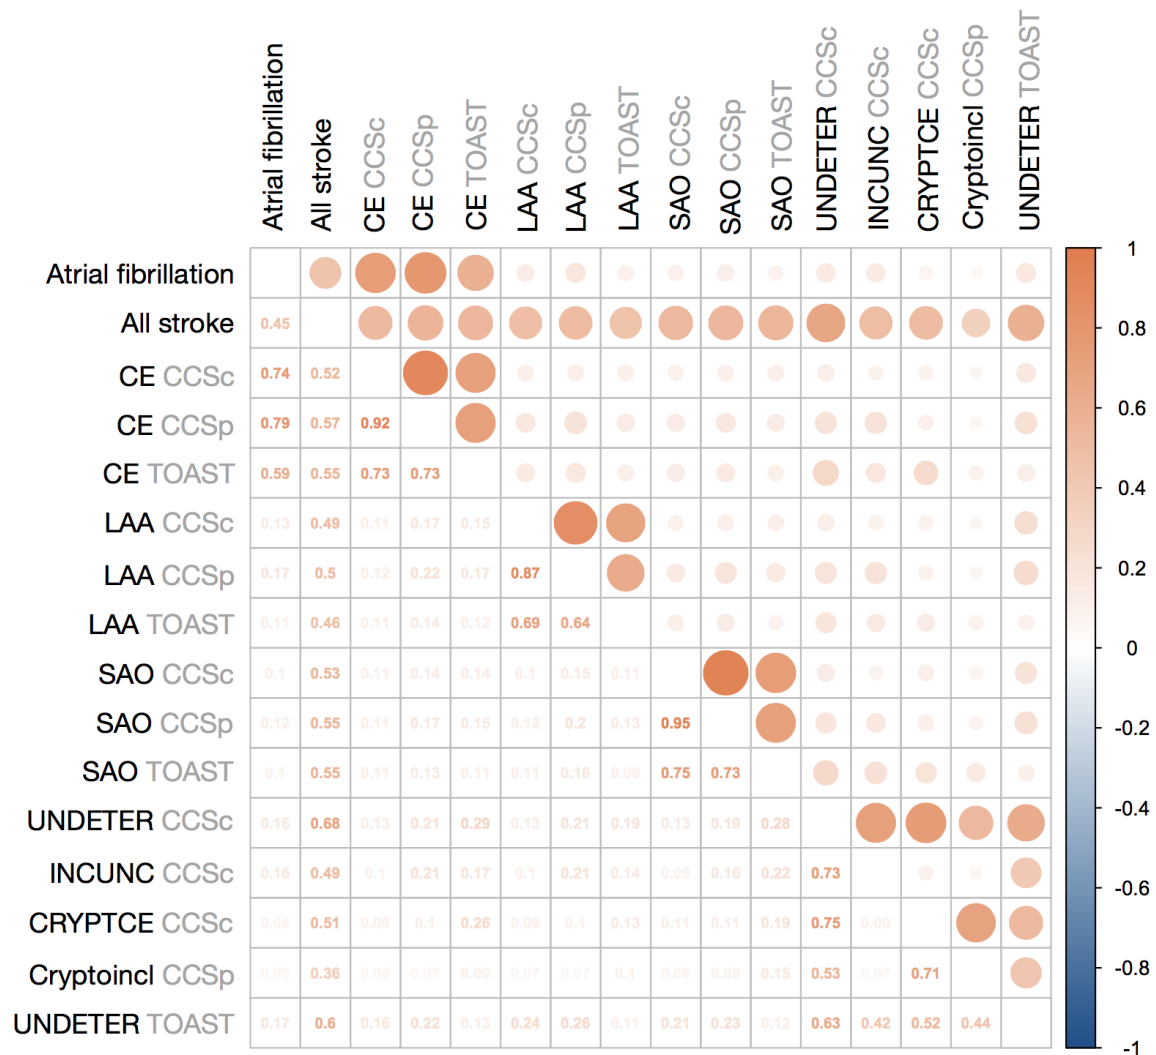

**b.** Same correlation calculations as in (a), but this time using the phenotypic data only (and looking in cases only, as all controls have the same phenotype). Note that the atrial fibrillation phenotypes and cardioembolic stroke phenotypes are highly correlated in the SiGN data ( $r = 0.83$  between atrial fibrillation and cardioembolic stroke as determined by the CCS Causative subtype system).

CE, cardioembolic stroke; LAA, large artery atherosclerosis; SAO, small artery occlusion; UNDETER, undetermined; INCUNC, incomplete/unclassified; CRYPTCE, cryptogenic and CE minor; Cryptoincl, cryptogenic; CCSc, CCS Causative subtyping system; CCSp, CCS Phenotypic subtyping system; TOAST, TOAST subtyping system.

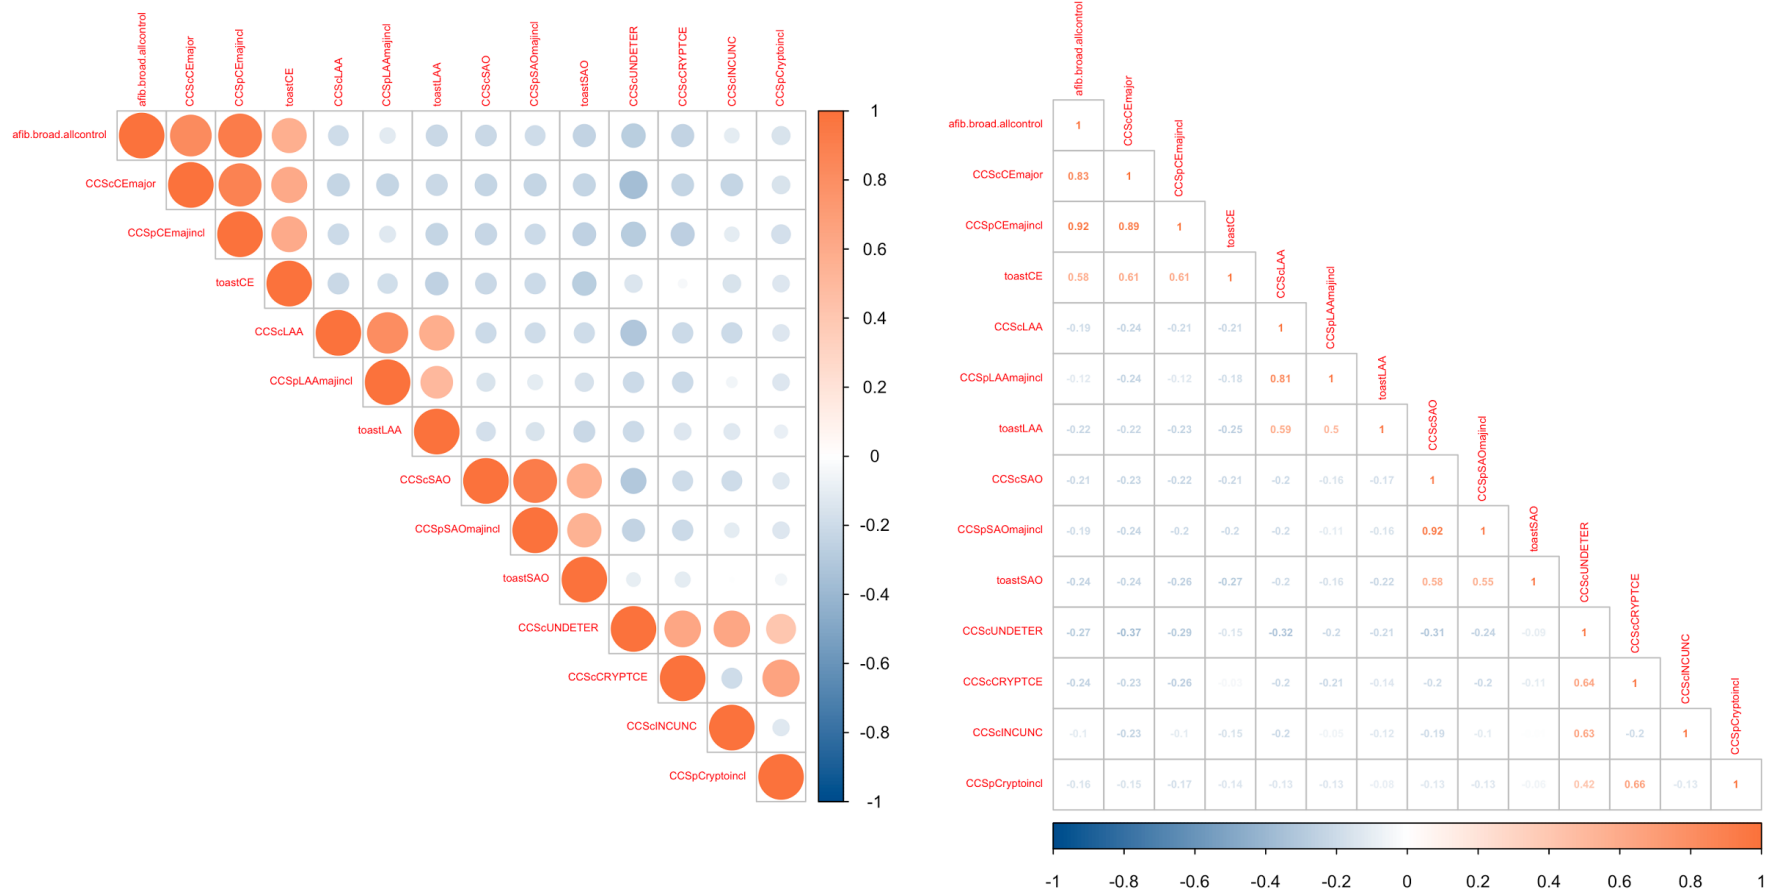

**Supplementary Figure 6 | Association of atrial fibrillation genetic risk score in ischemic stroke subtypes.**

We constructed a genetic risk score (GRS) from atrial fibrillation-associated SNPs, and tested for association between the score and ischemic stroke subtypes using (a) all available controls (N = 28,026) and (b) controls without atrial fibrillation (N = 3,861). All subtypes from all available subtyping systems are shown here. The GRS strongly associated to cardioembolic stroke (subtypes highlighted in green font) in both sets of controls. In the atrial fibrillation-free set of controls (b) we observed nominal association of the GRS to incomplete/unclassified stroke. Undetermined subtypes are indicated in blue font.

CE, cardioembolic stroke; LAA, large artery atherosclerosis; SAO, small artery occlusion; UNDETER, undetermined; INCUNC, incomplete/unclassified; CRYPTCE, cryptogenic and CE minor; Cryptoincl, cryptogenic; CCSc, CCS Causative subtyping system; CCSp, CCS Phenotypic subtyping system; TOAST, TOAST subtyping system.

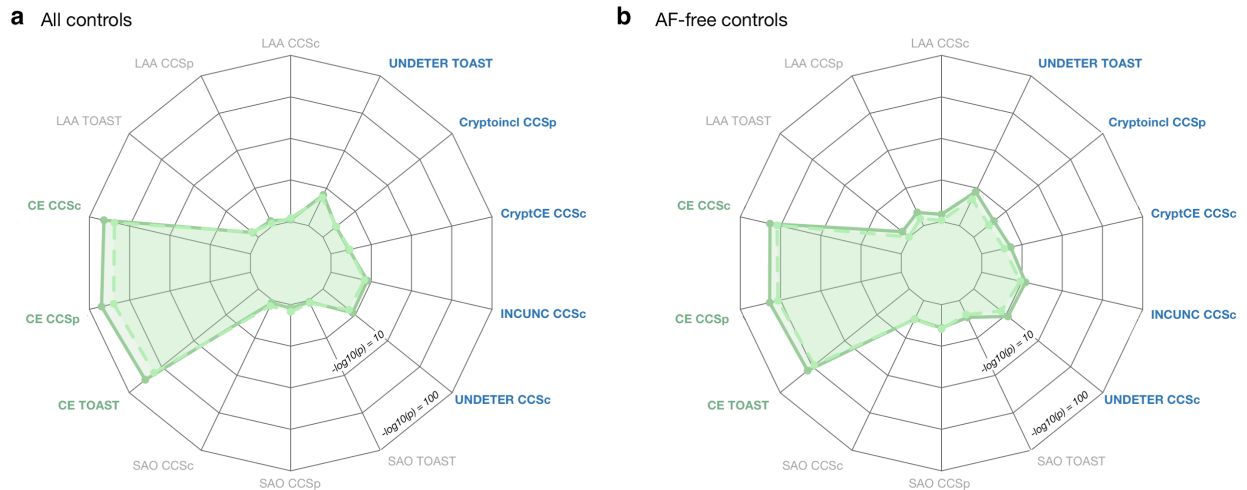

## Supplementary Methods

***Relevant code for the analyses performed in this paper can be found here: <https://github.com/saralpulit/Afib-Stroke-Overlap>.***

This repository primarily consists of:

Call to BOLT-LMM to run GWAS

Call to GCTA and BOLT-LMM to calculate heritability

Call to PLINK<sup>3,4</sup> to calculate the genetic risk score (GRS)

An R script for converting observed heritability in BOLT-LMM to the liability scale (see below)

A script in R to check association between the GRS and various phenotypes.

A call to PLINK<sup>3,4</sup> to calculate a GRM to run GCTA

Sample identifiers for those individuals analyzed in this paper

SNP identifiers and weights for those markers included in the construction of the genetic risk score

A complete README accompanies the GitHub repository.

### ***Case and referent data***

The full list of cohorts that are included in the SiGN genome-wide association study can be found in the Supplementary Material of "Loci associated with ischaemic stroke and its subtypes (SiGN): a genome-wide association study,"<sup>5</sup> which can be downloaded here: <https://paperpile.com/shared/nvNXQf>.

### ***Referent datasets***

Referent datasets downloaded from the Database of Genotypes and Phenotypes (dbGaP) are:

|                                                                        | dbGAP accession # |
|------------------------------------------------------------------------|-------------------|
| Genetics Resource with the Health and Retirement Study                 | phs000428.v2.p2   |
| Whole Genome Association Study of Visceral Adiposity in the HABC study | phs000169.v1.p1   |

### *Case datasets*

A large number of cases and a small number of controls (from Belgium and Poland) were genotyped at the initiation of the SiGN GWAS. These data have been uploaded to dbGaP and are available here:

The National Institute of Neurological Disorders and Stroke (NINDS) Stroke Genetics Network (SiGN) (phs000615.v1.p1)

### ***Sample and SNP identifiers used in these analyses***

A file containing:

the dbGaP sample identifiers

the cohort the sample is drawn from

the continental group the sample is in (as determined in the first SiGN GWAS effort<sup>5</sup>)

a list of quality control-passing SNPs used in the initial GWAS

Is available on this paper's GitHub repository.

### ***Summary-level genome-wide association study data***

The summary-level data from the original SiGN GWAS has been made publicly available through the Cerebrovascular Disease Knowledge Portal, which can be accessed here: <http://www.cerebrovascularportal.org/>

These summary-level results are available for cardioembolic stroke (CE), large artery atherosclerosis (LAA), small artery occlusion (SAO), and undetermined (UNDETER) stroke, for three different subtyping systems (TOAST, CCS Causative, CCS Phenotypic).

The summary-level results for the atrial fibrillation genome-wide association studies (performed in broadly-defined or strictly-defined cases versus all controls) are available here:

Broadly-defined atrial fibrillation cases vs. all referents:  
<https://doi.org/10.5281/zenodo.1035871>

Strictly-defined atrial fibrillation cases vs. all referents:  
<https://doi.org/10.5281/zenodo.1035873>

**SNP-based heritability calculations in GCTA and BOLT-LMM**

A description of heritability calculations is available in the Materials and Methods section of the primary calculation. Here, we provide additional analytic details. Heritability estimates were performed using GCTA<sup>2</sup> and BOLT-LMM<sup>6</sup> using BOLT-REML assuming a trait prevalence of 1%. The genetic relationship matrix (GRM, referred to by the --bfile and 'modelSNPs' option in BOLT-LMM) were selected four ways:

- (1) Genotyped SNPs only (minor allele frequency > 1%)  
*115,553 SNPs total*
- (2) Genotyped SNPs, pruned at a linkage disequilibrium threshold ( $r^2$  threshold) of 0.2, and removing the MHC, *LCT* locus, and two chromosomal inversions.  
*60,432 SNPs total*
- (3) Imputed SNPs (minor allele frequency > 1% and imputation info > 0.8) converted to best-guess genotypes.  
*1,128,985 SNPs total*
- (4) Imputed SNPs (minor allele frequency > 1% and imputation info > 0.8); pruned at a linkage disequilibrium threshold ( $r^2$  threshold) of 0.2; removing the MHC, *LCT* locus, and two chromosomal inversions; and converted to best-guess genotypes.  
*250,209 SNPs total*

As calculating GRMs in GCTA can be extremely computationally intensive, we calculated the GRMs using PLINK 1.9 and then used those GRMs to estimate heritability. A script that shows how to do this is included in the GitHub repository noted above.

The genomic locations (hg19) for excluded markers are as follows:

The lactase (*LCT*) locus  
Chromosome 2, positions 129,883,530 - 140,283,530

The major histocompatibility complex (MHC)  
Chromosome 6, positions 24,092,021 - 38,892,022

Inversion 1  
Chromosome 8, positions 6,612,592 - 13,455,629

Inversion 2  
Chromosome 17, positions 40,546,474 - 44,644,684

All non-autosomal SNPs



BOLT-LMM produces heritability estimates on the observed scale. To convert to the liability scale (i.e., the scale on which GCTA produces heritability estimates) we performed a conversion in R. Running the conversion requires knowing the trait prevalence, total cases analyzed, total controls analyzed, and the heritability on the observed scale. This code snippet is available in the accompanying GitHub repository for this paper.

# Appendix I

## Members of the Atrial Fibrillation Genetics (AFGen) Consortium

Please note that the AFGen Consortium participants evolve over time. Further information on the AFGen Consortium can be found at [www.afgen.org](http://www.afgen.org).

Ingrid E. Christophersen, MD, PhD<sup>1-3</sup> Joylene E. Siland, BSc,<sup>4</sup> Marju Orho-Melander, PhD<sup>92</sup>  
 Michiel Rienstra, MD, PhD<sup>4</sup> Michiaki Kubo, MD, PhD<sup>53</sup> Anders Hamsten, MD, PhD<sup>93</sup>  
 Carolina Roselli, MSc<sup>1,5,6</sup> Jonathan D. Smith, PhD<sup>9</sup> Jan Heeringa, MD, PhD<sup>22</sup>  
 Xiaoyan Yin, PhD<sup>7,8</sup> David R. Van Wagener, PhD<sup>9</sup> Joshua C. Denny, MD<sup>16</sup>  
 Bastiaan Geelhoed, PhD<sup>4</sup> Joshua C. Bis, PhD<sup>21</sup> Jennifer Kriebel, PhD<sup>54,63,69</sup>  
 John Barnard, PhD<sup>9</sup> Siegfried Perz, MSc<sup>54</sup> Dawood Darbar, MD<sup>94</sup>  
 Honghuang Lin, PhD<sup>7,8</sup> Bruce M. Psaty, MD, PhD<sup>21,55-57</sup> Christopher Newton-Cheh, MD,  
 Dan E. Arking, PhD<sup>10</sup> Paul M. Ridker, MD, MPH<sup>13</sup> MPH<sup>1,2</sup>  
 Albert V. Smith, PhD<sup>11,12</sup> Jared W. Magnani, MD, MSc<sup>7,58</sup> Christian Shaffer, BS,<sup>16</sup>  
 Christine M. Albert, MD, MPH<sup>13</sup> Tamara B. Harris, MD, MS<sup>59</sup> Peter W. Macfarlane, PhD, DSc<sup>95</sup>  
 Mark Chaffin, MSc<sup>1</sup> Lenore J. Launer, PhD<sup>59</sup> Stefanie Heilmann, PhD<sup>96,97</sup>  
 Nathan R. Tucker, PhD<sup>1,2</sup> M. Benjamin Shoemaker, MD, MSc<sup>16</sup> Peter Almgren, MSc<sup>92</sup>  
 Molong Li, MD<sup>2</sup> Sandosh Padmanabhan, MD<sup>60</sup> Paul L. Huang, MD, PhD<sup>2</sup>  
 Derek Klarin, MD<sup>1</sup> Jeffrey Haessler, MS<sup>61</sup> Nona Sotoodehnia, MD, MPH<sup>98</sup>  
 Nathan A Bihlmeyer, BS,<sup>14</sup> Traci M. Bartz, MS<sup>62</sup> Elsayed Z. Soliman, MD, MSc, MS<sup>99</sup>  
 Siew-Kee Low, PhD<sup>15</sup> Melanie Waldenberger, PhD<sup>19,54,63</sup> Andre G. Uitterlinden, PhD<sup>100</sup>  
 Peter E. Weeke, MD, PhD<sup>16,17</sup> Peter Lichtner, PhD<sup>64</sup> Albert Hofman, MD, PhD<sup>22</sup>  
 Martina Müller-Nurasyid, PhD<sup>5,18,19</sup> Marina Arendt, MSc<sup>65</sup> Oscar H. Franco, MD, PhD<sup>22</sup>  
 J. Gustav Smith, MD, PhD<sup>1,20</sup> Jose E. Krieger, MD, PhD<sup>33</sup> Uwe Völker, PhD<sup>24,42</sup>  
 Jennifer A. Brody, BA<sup>21</sup> Mika Kähönen, MD, PhD<sup>66</sup> Karl-Heinz Jöckel, PhD<sup>65</sup>  
 Maartje N. Niemeijer MD<sup>22</sup> Lorenz Risch, MD, MPH<sup>67</sup> Moritz F. Sinner, MD, MPH<sup>18,19</sup>  
 Marcus Dörr, MD<sup>23,24</sup> Alfredo J. Mansur, MD, PhD<sup>68</sup> Henry J. Lin, MD<sup>40</sup>  
 Stella Trompet, PhD<sup>25</sup> Annette Peters, PhD<sup>19,54,69</sup> Xiuqing Guo, PhD<sup>40</sup>  
 Jennifer Huffman, PhD<sup>26</sup> Blair H. Smith, MD<sup>70</sup> Martin Dichgans, MD<sup>32,101,102</sup>  
 Stefan Gustafsson, PhD<sup>27</sup> Lars Lind, MD, PhD<sup>71</sup> Erik Ingelsson, MD, PhD<sup>27,103</sup>  
 Claudia Schurmann, PhD<sup>28,29</sup> Stuart A. Scott, PhD<sup>72</sup> Charles Kooperberg, PhD<sup>61</sup>  
 Marcus E. Kleber, PhD<sup>30</sup> Yingchang Lu, MD, PhD<sup>28,29</sup> Olle Melander, MD, PhD<sup>104</sup>  
 Leo-Pekka Lyytikäinen, MD<sup>31</sup> Erwin B. Bottinger, MD<sup>28,73</sup> Ruth J. F. Loos, PhD<sup>28,29,105</sup>  
 Ilkka Seppälä, MD<sup>31</sup> Jussi Hernesniemi, MD, PhD<sup>31,74</sup> Jari Laurikka, MD, PhD<sup>106</sup>  
 Rainer Malik, PhD<sup>32</sup> Cecilia M. Lindgren, PhD<sup>75</sup> David Conen, MD, MPH<sup>36-38</sup>  
 Andrea R. V. R. Horimoto, PhD<sup>33</sup> Jorge A Wong, MD<sup>76</sup> Jonathan Rosand, MD, MSc<sup>1,41</sup>  
 Marco Perez, MD<sup>34</sup> Jie Huang, MD, MPH<sup>77</sup> Pim van der Harst, MD, PhD<sup>4</sup>  
 Juha Sinisalo, MD, PhD<sup>35</sup> Markku Eskola, MD, PhD<sup>74</sup> Marja-Liisa Lokki, PhD<sup>91</sup>  
 Stefanie Aeschbacher, MSc<sup>36,37</sup> Andrew P. Morris, PhD<sup>75,78</sup> Sekar Kathiresan, MD<sup>1</sup>  
 Sébastien Thériault, MD, MSc<sup>38,39</sup> Ian Ford, PhD<sup>79</sup> Alexandre Pereira, MD, PhD<sup>107</sup>  
 Jie Yao, MS<sup>40</sup> Alex P. Reiner, MD, MSc<sup>61,80</sup> J. Wouter Jukema, MD, PhD<sup>25,108,109</sup>  
 Farid Radmanesh, MD, MPH<sup>1,41</sup> Graciela Delgado, MSc<sup>30</sup> Caroline Hayward, PhD<sup>26</sup>  
 Stefan Weiss, PhD<sup>24,42</sup> Lin Y. Chen, MD, MS<sup>81</sup> Jerome I. Rotter, MD<sup>110</sup>  
 Alexander Teumer, PhD<sup>24,43</sup> Yii-Der Ida Chen, PhD<sup>40</sup> Winfried März, MD<sup>111</sup>  
 Seung Hoan Choi, PhD<sup>1</sup> Roopinder K. Sandhu, MD, MPH<sup>82</sup> Terho Lehtimäki, MD, PhD<sup>31</sup>  
 Lu-Chen Weng, PhD<sup>1,2</sup> Man Li, PhD<sup>83,84</sup> Bruno H. Stricker, MD, PhD<sup>112</sup>  
 Sebastian Clauss, MD<sup>2,18</sup> Eric Boerwinkle, PhD<sup>85</sup> Mina K. Chung, MD<sup>9</sup>  
 Rajat Deo, MD, MTR<sup>44</sup> Lewin Eisele, MD<sup>65</sup> Stephan B. Felix, MD<sup>23,24</sup>  
 Daniel J. Rader, MD<sup>44</sup> Lars Lannfelt, MD, PhD<sup>86</sup> Vilmundur Gudnason, MD, PhD<sup>11,12</sup>  
 Svati Shah, MD, MHS,<sup>45</sup> Natalia Rost, MD, MPH, FAAN,<sup>1,87</sup> Alvaro Alonso, MD, PhD<sup>113</sup>  
 Albert Sun, MD<sup>45</sup> Christopher D. Anderson, MD, MMSc<sup>1,41</sup> Dan M. Roden, MD<sup>16</sup>  
 Jemma C. Hopewell, PhD<sup>46</sup> Kent D. Taylor, PhD<sup>40</sup> Stefan Kääh, MD, PhD<sup>18,19</sup>  
 Stephanie Debette, MD, PhD<sup>47-50</sup> Archie Campbell, MA,<sup>88</sup> Daniel I. Chasman, PhD<sup>1,114</sup>  
 Ganesh Chauhan, PhD<sup>47,48</sup> Patrik K. Magnusson, PhD<sup>89</sup> Susan R. Heckbert, MD, PhD<sup>55,56</sup>  
 Qiong Yang, PhD<sup>51</sup> David Porteous, PhD<sup>88</sup> Emelia J. Benjamin, MD, ScM<sup>7,58,115</sup>  
 Bradford B. Worrall, MD, MSc<sup>52</sup> Lynne J. Hocking, PhD<sup>90</sup> Toshihiro Tanaka, MD, PhD<sup>116,117</sup>  
 Guillaume Paré, MD, MSc<sup>38,39</sup> Efthymia Vlachopoulou, PhD<sup>91</sup> Kathryn L. Lunetta, PhD<sup>7,8</sup>  
 Yoichiro Kamatani, MD, PhD<sup>15</sup> Nancy L. Pedersen, MA, PhD<sup>89</sup> Steven A. Lubitz, MD, MPH<sup>1,2,118</sup>  
 Yanick P. Hagemeijer, MSc<sup>4</sup> Kjell Nikus, MD, PhD<sup>74</sup> Patrick T. Ellinor, MD, PhD<sup>1,2,118</sup>  
 Niek Verweij, PhD<sup>4</sup>

## **AFGen Consortium Member Affiliations**

1. Program in Medical and Population Genetics, The Broad Institute of MIT and Harvard, Cambridge, MA, USA.
2. Cardiovascular Research Center, Massachusetts General Hospital, Boston, MA, USA.
3. Department of Medical Research, Bærum Hospital, Vestre Viken Hospital Trust, Norway.
4. Department of Cardiology, University of Groningen, University Medical Center Groningen, Groningen, The Netherlands.
5. Institute of Genetic Epidemiology, Helmholtz Zentrum München - German Research Center for Environmental Health, Neuherberg, Germany.
6. Institute of Medical Informatics, Biometry and Epidemiology, Chair of Genetic Epidemiology, Ludwig-Maximilians-Universität, Munich, Germany.
7. NHLBI and Boston University's Framingham Heart Study, Framingham, MA, USA.
8. Department of Biostatistics, Boston University School of Public Health, Boston, MA, USA.
9. Departments of Cardiovascular Medicine, Cellular and Molecular Medicine, Molecular Cardiology, and Quantitative Health Sciences, Cleveland Clinic, Cleveland, OH, USA.
10. McKusick-Nathans Institute of Genetic Medicine, Johns Hopkins University School of Medicine, Baltimore, MD, USA.
11. Icelandic Heart Association, Kopavogur, Iceland.
12. Faculty of Medicine, University of Iceland, Reykavik, Iceland.
13. Divisions of Preventive and Cardiovascular Medicine, Brigham and Women's Hospital & Harvard Medical School, Boston, MA, USA.
14. Predoctoral Training Program in Human Genetics, McKusick-Nathans Institute of Genetic Medicine, Johns Hopkins University School of Medicine, Baltimore, MD, USA.
15. Laboratory for Statistical Analysis, RIKEN Center for Integrative Medical Sciences, Yokohama, Japan.
16. Department of Medicine, Vanderbilt University Medical Center, Nashville, TN, USA.
17. The Heart Centre, Department of Cardiology, Copenhagen University Hospital, Rigshospitalet, Copenhagen, Denmark.
18. Department of Medicine I, University Hospital Munich, Ludwig-Maximilians-University, Munich, Germany.
19. DZHK (German Centre for Cardiovascular Research), partner site: Munich Heart Alliance, Munich, Germany.
20. Molecular Epidemiology and Cardiology, Clinical Sciences, Lund University, Lund, Sweden.
21. Cardiovascular Health Research Unit, Department of Medicine, University of Washington, Seattle, WA, USA.
22. Department of Epidemiology, Erasmus University Medical Center Rotterdam, Rotterdam, the Netherlands.
23. Department of Internal Medicine B, University Medicine Greifswald, Greifswald, Germany.
24. DZHK (German Centre for Cardiovascular Research), partner site: Greifswald, Germany.
25. Department of Cardiology, Leiden University Medical Center, The Netherlands.
26. MRC Human Genetics Unit, Institute of Genetics and Molecular Medicine, University of Edinburgh, UK.
27. Department of Medical Sciences, Molecular Epidemiology and Science for Life Laboratory, Uppsala University, Uppsala, Sweden.
28. The Charles Bronfman Institute for Personalized Medicine, Icahn School of Medicine

- at Mount Sinai, New York, NY, USA.
29. The Genetics of Obesity and Related Metabolic Traits Program, Icahn School of Medicine at Mount Sinai, New York, NY, USA.
  30. Vth Department of Medicine, Medical Faculty Mannheim, Heidelberg University, Germany.
  31. Department of Clinical Chemistry, Fimlab Laboratories and University of Tampere School of Medicine, Tampere, Finland.
  32. Institute for Stroke and Dementia Research, Klinikum der Universität München, Ludwig-Maximilians University, München, Germany.
  33. Laboratory of Genetics and Molecular Cardiology, Heart Institute, University of Sao Paulo, Sao Paulo, Brazil.
  34. Stanford University, Stanford, CA, USA.
  35. Heart and Lung Center HUS, Helsinki University Central Hospital, Helsinki, Finland.
  36. University Hospital Basel, Switzerland.
  37. Cardiovascular Research Institute Basel, Switzerland.
  38. Population Health Research Institute, Hamilton, Canada.
  39. Department of Pathology and Molecular Medicine, McMaster University, Hamilton, Canada.
  40. Institute for Translational Genomics and Population Sciences, Department of Pediatrics, LABioMed at Harbor-UCLA Medical Center, Torrance, CA, USA.
  41. Center for Human Genetics Research, Massachusetts General Hospital, Boston, MA, USA.
  42. Interfaculty Institute for Genetics and Functional Genomics, University Medicine and Ernst-Moritz-Arndt-University Greifswald, Greifswald, Germany.
  43. Institute for Community Medicine, University Medicine Greifswald, Greifswald, Germany.
  44. Division of Cardiovascular Medicine, Department of Medicine, Perelman School of Medicine at the University of Pennsylvania, Philadelphia, PA, USA.
  45. Division of Cardiology, Department of Medicine, Duke University School of Medicine, Durham, NC, USA.
  46. CTSU - Nuffield Department of Population Health, University of Oxford, Oxford, UK.
  47. Inserm Center U1219 (Bordeaux Population Health Centre), Bordeaux, France.
  48. University of Bordeaux, Bordeaux, France.
  49. Department of Neurology, Bordeaux University Hospital, Bordeaux, France.
  50. Department of Neurology, Boston University School of Medicine, Boston, MA, USA.
  51. Biostatistics Department, School of Public Health, Boston University, Boston, MA, USA.
  52. University of Virginia Health System, Departments of Neurology and Public Health Science, Charlottesville, VA, USA.
  53. RIKEN Center for Integrative Medical Sciences, Yokohama, Japan.
  54. Institute of Epidemiology II, Helmholtz Zentrum München - German Research Center for Environmental Health, Neuherberg, Germany.
  55. Department of Epidemiology and Cardiovascular Health Research Unit, University of Washington, Seattle, WA, USA.
  56. Group Health Research Institute, Group Health Cooperative, Seattle, WA, USA.
  57. Department of Health Services, University of Washington, Seattle, WA, USA.
  58. Department of Medicine, Boston University School of Medicine, Boston, MA, USA.
  59. Laboratory of Epidemiology, Demography, and Biometry, National Institute on Aging, Bethesda, MD, USA.
  60. Institute of Cardiovascular and Medical Sciences, BHF Glasgow Cardiovascular Research Centre, University of Glasgow, Glasgow, UK.
  61. Fred Hutchinson Cancer Research Center, University of Washington, Seattle, WA, USA.

62. Cardiovascular Health Research Unit, Departments of Medicine and Biostatistics, University of Washington, Seattle, WA, USA.
63. Research unit of Molecular Epidemiology, Helmholtz Zentrum München - German Research Center for Environmental Health, Neuherberg, Germany.
64. Institute of Human Genetics, Helmholtz Zentrum München - German Research Center for Environmental Health, Neuherberg, Germany.
65. Institute for Medical Informatics, Biometry, and Epidemiology, University Hospital, University Duisburg-Essen, Germany.
66. Department of Clinical Physiology, Tampere University Hospital and University of Tampere School of Medicine, Tampere, Finland.
67. University Institute of Clinical Chemistry, University of Bern, Switzerland and labormedizinisches zentrum Dr. Risch, Schaan, Liechtenstein.
68. Heart Institute, University of Sao Paulo, Sao Paulo, Brazil.
69. German Center for Diabetes Research, Neuherberg, Germany.
70. Division of Population Health Sciences, University of Dundee, Scotland, UK.
71. Department of Medical Sciences, Cardiovascular Epidemiology, Uppsala University, Uppsala, Sweden.
72. Department of Genetics and Genomic Sciences , Icahn School of Medicine at Mount Sinai, New York, NY, USA.
73. Department of Pharmacology and Systems Therapeutics, Icahn School of Medicine at Mount Sinai, New York, NY, USA.
74. Department of Cardiology, Heart Hospital, Tampere University Hospital and University of Tampere School of Medicine, Tampere, Finland.
75. Wellcome Trust Centre for Human Genetics, University of Oxford, Oxford, UK.
76. Division of Cardiology, Hamilton Health Sciences, McMaster University, Hamilton, Ontario, Canada.
77. Boston VA Research Institute, Inc., Boston, MA, USA.
78. Department of Biostatistics, University of Liverpool, Liverpool, UK.
79. Robertson Center for Biostatistics, University of Glasgow, Glasgow, UK.
80. Department of Epidemiology, University of Washington, Seattle, WA, USA.
81. Cardiovascular Division, Department of Medicine, University of Minnesota Medical School, Minneapolis, MN, USA.
82. Division of Cardiology, University of Alberta, Edmonton, Canada.
83. Department of Epidemiology, Johns Hopkins University, Baltimore, MD, USA.
84. Division of Nephrology & Hypertension, Internal Medicine, School of Medicine, University of Utah, UT, USA.
85. Human Genome Sequencing Center, Baylor College of Medicine, Houston, TX, USA.
86. Department of Public Health and Caring Sciences, Geriatrics, Uppsala University, Uppsala, Sweden.
87. Acute Stroke Services, Massachusetts General Hospital, Boston, MA, USA.
88. Generation Scotland, Centre for Genomic and Experimental Medicine, Institute of Genetics and Molecular Medicine, University of Edinburgh, UK.
89. Department of Medical Epidemiology and Biostatistics, Karolinska Institutet, Stockholm, Sweden.
90. Musculoskeletal Research Programme, Division of Applied Medicine, University of Aberdeen, Aberdeen, UK.
91. Transplantation Laboratory, Medicum, University of Helsinki, Helsinki, Finland.
92. Department of Clinical Sciences, Lund University, Malmö, Sweden.
93. Cardiovascular Genetics and Genomics Group, Atherosclerosis Research Unit, Department of Medicine Solna, Karolinska Institutet, Stockholm, Sweden.
94. University of Illinois, Chicago, IL, USA.
95. Institute of Health and Wellbeing, College of Medical, Veterinary and Life Sciences, University of Glasgow, UK.

96. Institute of Human Genetics, University of Bonn, Germany.
97. Department of Genomics, Life & Brain Research Center, University of Bonn, Germany.
98. Cardiovascular Health Research Unit, University of Washington Medical Center, Seattle, WA, USA.
99. Epidemiological Cardiology Research Center (EPICARE), Wake Forest School of Medicine, Winston Salem, NC, USA.
100. Department of Epidemiology and Internal Medicine, Erasmus University Medical Center Rotterdam, the Netherlands.
101. Munich Cluster for Systems Neurology (SyNergy), München, Germany.
102. German Center for Neurodegenerative Diseases (DZNE), Munich, Germany.
103. Department of Medicine, Division of Cardiovascular Medicine, Stanford University School of Medicine, Stanford, CA, USA.
104. Department of Internal Medicine, Clinical Sciences, Lund University, Malmö, Sweden.
105. The Mindich Child Health and Development Institute, Icahn School of Medicine at Mount Sinai, New York, NY, USA.
106. Department of Cardio-Thoracic Surgery, Heart Hospital, Tampere University Hospital and University of Tampere School of Medicine, Tampere, Finland.
107. Laboratory of Genetics and Molecular Biology, Heart Institute, University of Sao Paulo, Sao Paulo, Brazil and Department of Genetics, Harvard Medical School, Boston, MA, USA.
108. Durrer Center for Cardiogenetic Research, Amsterdam, The Netherlands.
109. Interuniversity Cardiology Institute of the Netherlands, Utrecht, The Netherlands.
110. Institute for Translational Genomics and Population Sciences, Departments of Pediatrics and Medicine, LABioMed at Harbor-UCLA Medical Center, Torrance, CA, USA.
111. Clinical Institute of Medical and Chemical Laboratory Diagnostics, Medical University of Graz, Graz, Austria and Synlab Academy, Synlab Services GmbH, Mannheim, Germany.
112. Department of Epidemiology and Internal Medicine, Erasmus University Medical Center Rotterdam, the Netherlands and Inspectorate of Health Care, Utrecht, the Netherlands.
113. Department of Epidemiology, Rollins School of Public Health, Emory University, Atlanta, GA, USA.
114. Divisions of Preventive Medicine and Genetics, Brigham and Women's Hospital & Harvard Medical School, Boston, MA, USA.
115. Department of Epidemiology, Boston University School of Public Health, Boston, MA, USA.
116. Laboratory for Cardiovascular Diseases, RIKEN Center for Integrative Medical Sciences, Yokohama, Japan.
117. Department of Human Genetics and Disease Diversity, Tokyo Medical and Dental University Graduate School of Medical and Dental Sciences, Tokyo, Japan.
118. Cardiac Arrhythmia Service, Massachusetts General Hospital, Boston, MA, USA.

## Appendix II

### Members of the International Stroke Genetics Consortium (ISGC)

Please note that ISGC participants evolve over time. Further information on the ISGC can be found at <http://www.strokegenetics.org/>.

|                                         |                                           |                                             |
|-----------------------------------------|-------------------------------------------|---------------------------------------------|
| Sylvia Smoller, PhD <sup>1</sup>        | Marcin Wnuk, MD <sup>29</sup>             | Anna Bersano, MD <sup>46</sup>              |
| John Sorkin, MD <sup>2</sup>            | Rafael Olszanecki, MD <sup>29</sup>       | Tatjana Rundek, MD <sup>47</sup>            |
| Xingwu Wang, MD <sup>3</sup>            | Joanna Pera, MD <sup>29</sup>             | Ralph Sacco, MD <sup>47</sup>               |
| Magdy Selim, MD, PhD <sup>4</sup>       | Agnieszka Slowik, MD <sup>29</sup>        | Yu-Feng Yvonne Chan, MD <sup>48</sup>       |
| Aleksandra Pikula, MD, PhD <sup>5</sup> | Karol Jozef Juchniewicz, MD <sup>29</sup> | Andreas Gschwendtner, MD, PhD <sup>35</sup> |
| Philip Wolf, MD, PhD <sup>5</sup>       | Christopher Levi, MD <sup>30</sup>        | Zhen Deng, MD <sup>49</sup>                 |
| Stephanie Debette, MD <sup>5</sup>      | Paul Nyquist, MD, PhD <sup>31</sup>       | Taura Barr, MD <sup>50</sup>                |
| Sudha Seshadri, MD <sup>5</sup>         | Iscia Cendes, MD <sup>32</sup>            | Katrina Gwinn, MD <sup>50</sup>             |
| Paul de Bakker, PhD <sup>6</sup>        | Norberto Cabral, MD <sup>32</sup>         | Roderick Corriveau, MD <sup>50</sup>        |
| Sara L. Pulit, PhD <sup>6</sup>         | Paulo Franca, MD <sup>32</sup>            | Andrew Singleton, MD, PhD <sup>50</sup>     |
| Daniel Chasman, MD <sup>7</sup>         | Anderson Goncalves, MD <sup>32</sup>      | Salina Waddy, MD <sup>50</sup>              |
| Kathryn Rexrode, MD <sup>7</sup>        | Lina Keller, MD <sup>33</sup>             | Lenore Launer, MD <sup>50</sup>             |
| Ida Chen, MD <sup>8</sup>               | Milita Crisby, MD <sup>33</sup>           | Christopher Chen, MD <sup>51</sup>          |
| Jerome Rotter, MD <sup>8</sup>          | Konstantinos Kostulas, MD <sup>33</sup>   | Kim En Le, MD <sup>51</sup>                 |
| May Luke, MD <sup>9</sup>               | Robin Lemmens, MD <sup>34</sup>           | Wei Ling Lee, MD <sup>51</sup>              |
| Michelle Sale, MD <sup>10</sup>         | Kourosh Ahmadi, MD <sup>34</sup>          | Eng King Tan, MD <sup>51</sup>              |
| Tsong-Hai Lee, MD <sup>11</sup>         | Christian Opherck, MD <sup>35</sup>       | Akintomi Olugbodi, MD <sup>52</sup>         |
| Ku-Chou Chang, MD <sup>11</sup>         | Marco Duering, MD <sup>35</sup>           | Peter Rothwell, MD, PhD <sup>53</sup>       |
| Mitchell Elkind, MD, MS <sup>12</sup>   | Martin Dichgans, MD <sup>35</sup>         | Sabrina Schilling, MD <sup>54</sup>         |
| Larry Goldstein, MD, PhD <sup>13</sup>  | Rainer Malik, PhD <sup>35</sup>           | Vincent Mok, MD <sup>55</sup>               |
| Michael Luke James, MD <sup>13</sup>    | Mariya Gonik, MD <sup>35</sup>            | Elena Lebedeva, MD <sup>56</sup>            |
| Monique Breteler, MD <sup>14</sup>      | Julie Staals, MD <sup>36</sup>            | Christina Jern, MD <sup>57</sup>            |
| Chris O'Donnell, MD <sup>15</sup>       | Olle Melander, MD, PhD <sup>37</sup>      | Katarina Jood, MD <sup>57</sup>             |
| Didier Leys, MD <sup>16</sup>           | Philippe Burri, MD <sup>37</sup>          | Sandra Olsson, MD <sup>57</sup>             |
| Cara Carty, MD <sup>17</sup>            | Ariane Sadr-Nabavi, MD <sup>38</sup>      | Helen Kim, MD <sup>58</sup>                 |
| Chelsea Kidwell, MD <sup>18</sup>       | Javier Romero, MD, PhD <sup>39</sup>      | Chaeyoung Lee, MD <sup>59</sup>             |
| Jes Olesen, MD <sup>19</sup>            | Alessandro Biffi, MD <sup>39</sup>        | Laura Kilarski, MD <sup>60</sup>            |
| Pankaj Sharma, MD, PhD <sup>20</sup>    | Chris Anderson, MD <sup>39</sup>          | Hugh Markus, MD <sup>60</sup>               |
| Stephen Rich, MD, PhD <sup>21</sup>     | Guido Falcone, MD <sup>39</sup>           | Jennifer Peycke, MD <sup>60</sup>           |
| Turgot Tatlisumak, MD <sup>22</sup>     | Bart Brouwers, MD <sup>39</sup>           | Steve Bevan, PhD <sup>60</sup>              |
| Olli Happonen, MD <sup>22</sup>         | Jonathan Rosand, MD, MSc <sup>39</sup>    | Wayne Sheu, MD <sup>61</sup>                |
| Philippe Bijlenga, MD <sup>23</sup>     | Natalia Rost, MD, MSc <sup>39</sup>       | Hung Yi Chiou, MD <sup>62</sup>             |
| Carolina Soriano, MD <sup>24</sup>      | Rose Du, MD <sup>39</sup>                 | Joseph Chern, MD <sup>62</sup>              |
| Eva Giralt, MD <sup>24</sup>            | Christina Kourkoulis, BA <sup>39</sup>    | Elias Giraldo, MD <sup>63</sup>             |
| Jaume Roquer, MD <sup>24</sup>          | Thomas Battey, BA <sup>39</sup>           | Muhammad Taqi, MD <sup>63</sup>             |
| Jordi Jimenez-Conde, MD <sup>24</sup>   | Steven Lubitz, MD, PhD <sup>39</sup>      | Vivek Jain, MD <sup>64</sup>                |
| Ioana Cotlarcius, MD <sup>25</sup>      | Bertram Mueller-Myhsok, MD <sup>40</sup>  | Olivia Lam, MD <sup>65</sup>                |
| John Hardy, MD <sup>26</sup>            | James Meschia, MD <sup>40</sup>           | George Howard, MD <sup>66</sup>             |
| Michal Korostynski, MD <sup>27</sup>    | Thomas Brott, MD, PhD <sup>41</sup>       | Daniel Woo, MD <sup>67</sup>                |
| Giorgio Boncoraglio, MD <sup>28</sup>   | Guillaume Pare, MD <sup>42</sup>          | Steven Kittner, MD <sup>68</sup>            |
| Elena Ballabio, MD <sup>28</sup>        | Alexander Pichler, MD <sup>43</sup>       | Braxton Mitchell, PhD, MPH <sup>68</sup>    |
| Eugenio Parati, MD <sup>28</sup>        | Christian Enzinger, MD <sup>43</sup>      | John Cole, MD <sup>68</sup>                 |
| Adamski Mateusz, MD <sup>29</sup>       | Helena Schmidt, MD <sup>43</sup>          | Jeff O'Connell, MD <sup>68</sup>            |
| Andrzej Urbanik, MD <sup>29</sup>       | Reinhold Schmidt, MD <sup>43</sup>        | Dianna Milewicz, MD <sup>69</sup>           |
| Tomasz Dziedzic, MD <sup>29</sup>       | Stephan Seiler, MD <sup>43</sup>          | Kachikwu Illoh, MD <sup>70</sup>            |
| Jeremiasz Jagiella, MD <sup>29</sup>    | Susan Blanton, MD <sup>44</sup>           | Bradford Worrall, MD <sup>21</sup>          |
| Jerzy Gasowski, MD <sup>29</sup>        | Yoshiji Yamada, MD <sup>45</sup>          | Colin Stine, MD <sup>70</sup>               |

|                                        |                                       |                                             |
|----------------------------------------|---------------------------------------|---------------------------------------------|
| Bartosz Karaszewski, MD <sup>71</sup>  | Danish Saleheen, MD <sup>80</sup>     | John Attia, MD <sup>91</sup>                |
| David Werring, MD <sup>71</sup>        | Joseph Broderick, MD <sup>81</sup>    | Martin Farrall, MD <sup>92</sup>            |
| Reecha Sofat, MD <sup>71</sup>         | Brett Kissela, MD <sup>81</sup>       | Anne-Katrin Giese, MD <sup>93</sup>         |
| June Smalley, MD <sup>71</sup>         | Alex Doney, MD <sup>82</sup>          | Myriam Fornage, MD <sup>94</sup>            |
| Arne Lindgren, MD <sup>72</sup>        | Cathie Sudlow, MD <sup>83</sup>       | Jennifer Majersik, MD <sup>95</sup>         |
| Bjorn Hansen, BA <sup>72</sup>         | Kristiina Rannikmae, MD <sup>83</sup> | Mary Cushman, MD <sup>96</sup>              |
| Bo Norrving, MD <sup>72</sup>          | Scott Silliman, MD <sup>84</sup>      | Keith Keene, MD <sup>97</sup>               |
| Gustav Smith, MD <sup>72</sup>         | Caitrin McDonough, MD <sup>84</sup>   | Siiri Bennett, MD <sup>98</sup>             |
| Juan Jose Martin, MD <sup>73</sup>     | Matthew Walters, MD <sup>85</sup>     | David Tirschwell, MD, MSc <sup>98</sup>     |
| Vincent Thijs, MD <sup>74</sup>        | Annie Pedersen, MD <sup>86</sup>      | Bruce Psaty, MD <sup>98</sup>               |
| Karin Klijn, MD <sup>75</sup>          | Kazuma Nakagawa, MD <sup>87</sup>     | Alex Reiner, MD <sup>98</sup>               |
| Femke van't Hof, MD, PhD <sup>75</sup> | Christy Chang, MD <sup>88</sup>       | Will Longstreth, MD <sup>99</sup>           |
| Ale Algra, MD <sup>75</sup>            | Mark Dobbins, MD <sup>88</sup>        | David Spence, MD <sup>100</sup>             |
| Mary Macleod, MD <sup>76</sup>         | Patrick McArdle, PhD <sup>88</sup>    | Joan Montaner, MD <sup>101</sup>            |
| Rodney Perry, MD <sup>77</sup>         | Yu-Ching Chang, MD <sup>88</sup>      | Israel Fernandez-Cadenas, MD <sup>102</sup> |
| Donna Arnett, MD <sup>77</sup>         | Robert Brown, MD <sup>89</sup>        | Carl Langefeld, MD <sup>102</sup>           |
| Alessandro Pezzini, MD <sup>78</sup>   | Devin Brown, MD <sup>89</sup>         | Cheryl Bushnell, MD <sup>102</sup>          |
| Alessandro Padovani, MD <sup>78</sup>  | Elizabeth Holliday, MD <sup>90</sup>  | Laura Heitsch, MD <sup>103</sup>            |
| Steve Cramer, MD, PhD <sup>79</sup>    | Raj Kalaria, MD <sup>91</sup>         | Jin-Moo Lee, MD, PhD <sup>103</sup>         |
| Mark Fisher, MD <sup>79</sup>          | Jane Maguire, MD <sup>91</sup>        | Kevin Sheth, MD <sup>104</sup>              |

### ISGC Consortium Member Affiliations

1. Albert Einstein College of Medicine, Bronx, NY, USA
2. Baltimore VA Medical Center, Baltimore, MD, USA
3. Beijing Hypertension League Institute, Beijing, China
4. Beth Israel Deaconess Medical Center, Boston, MA, USA
5. Boston University Medical Center, Boston, MA, USA
6. University Medical Center Utrecht, Utrecht, The Netherlands
7. Brigham and Women's Hospital, Boston, MA, USA
8. Cedars Sinai Medical Center, Los Angeles, CA, USA
9. Celera, Alameda, CA, USA
10. University of Virginia, Charlottesville, VA, USA
11. Chang Gung Memorial Hospital, Linkou Medical Center, Guishan District, Taoyuan City, Taiwan
12. Columbia University, New York, NY, USA
13. Duke University, Durham, NC, USA
14. Erasmus University, Rotterdam, Zuid Holland, The Netherlands
15. Framingham Heart Study, Framingham, MA, USA
16. Université du Droit et de la Santé Lille, Lille, France
17. Fred Hutchinson Cancer Research Center, Seattle, WA, USA
18. Georgetown University, Georgetown, MD, USA
19. Glostrup Hospital, Glostrup, Denmark
20. Hammersmith Hospitals & Imperial College London, London, UK
21. University of Virginia Health System, Charlottesville, VA, USA
22. Helsinki University Central Hospital, Helsinki, Finland
23. Hôpitaux Universitaires de Genève, Geneva, Switzerland
24. IMIM-Hospital del Mar, Barcelona, Spain
25. Imperial College London, London, UK
26. Institute of Neurology, University College London, London, UK
27. Institute of Pharmacology, Krakow, Poland
28. IRCCS Istituto Neurologico Carlo Besta, Milan, Italy
29. Jagiellonian University, Krakow, Poland



30. John Hunter Hospital, University of Newcastle, Newcastle, New-South-Wales, Australia
31. Johns Hopkins School of Medicine, Baltimore, MD, USA
32. Joinville Biobank, Joinville, Brazil
33. Karolinska Institutet, Karolinska, Sweden
34. Leuven University, Leuven, Belgium
35. Ludwig-Maximilians-Universitat, Munchen, Germany
36. Maastricht University Medical Centre, Maastricht, the Netherlands
37. Malmo University Hospital, Malmo, Sweden
38. Mashhad University of Medical Sciences, Mashhad, Iran
39. Massachusetts General Hospital, Boston, MA, USA
40. Max Planck Institute of Psychiatry, Munich, Germany
41. Mayo Clinic, Rochester, MN, USA
42. McMaster University, Hamilton, Canada
43. Medical University Graz, Graz, Austria
44. Miami Institute of Human Genomics, University of Miami Miller School of Medicine, Miami, FL
45. Mie University, Tsu, Japan
46. Milan University, Milan, Italy
47. University of Miami, Miami, FL, USA
48. Mount Sinai Medical Center, Miami Beach, FL, USA
49. Nanfang Hospital, Southern Medical University, Guangdong, China
50. National Institutes of Health, Bethesda, MD, USA
51. National Neuroscience Institute, Singapore General Hospital, Singapore
52. Obafemi Awolowo University, Ile-Ife, Nigeria
53. Radcliffe Infirmary, Oxford University, Oxford, UK
54. University of Bordeaux, Bordeaux, France
55. Prince of Wales Hospital, The Chinese University of Hong Kong, Hong Kong
56. Ulm University, Ulm, Germany
57. Sahlgrenska University Hospital, Gothenburg, Sweden
58. Center for Cerebrovascular Research, San Francisco General Hospital, San Francisco, CA, USA
59. Soongsil University, Seoul, South Korea
60. St. George's University of London, London, UK
61. Taichung Veterans General Hospital, Taichung City, Taiwan
62. Taipei Medical University, Taipei City, Taiwan
63. The University of Tennessee Health Science Center at Memphis, Memphis, TN, USA
64. University of California Irvine Medical Center, Irvine, CA, USA
65. University of California San Francisco, San Francisco, CA, USA
66. University of Alabama School of Public Health
67. University of Cincinnati, Cincinnati, OH, USA
68. University of Maryland School of Medicine, Baltimore, MD, USA
69. University of Texas Medical School at Houston, Houston, TX, USA
70. University of Texas-Houston, Houston, TX, MA
71. University College London, London, UK
72. University Hospital Lund, Lund, Sweden
73. University Hospital Sanatorio Allende, Cordoba, Argentina
74. University Hospital Leuven, Leuven, Belgium
75. University Medical Center Utrecht, Utrecht, The Netherlands
76. University of Aberdeen, Aberdeen, Scotland
77. University of Alabama at Birmingham School of Public Health, Birmingham, AL, USA
78. University of Brescia, Brescia, Italy
79. University of California Irvine, Irvine, CA, USA

80. University of Pennsylvania, Philadelphia, PA, USA
81. University of Cincinnati, Cincinnati, OH, USA
82. University of Dundee, Dundee, Scotland
83. University of Edinburgh, Western General Hospital, Edinburgh, Scotland
84. University of Florida, Gainesville, FL, USA
85. University of Glasgow, Glasgow, Scotland, UK
86. University of Gothenburg, Gothenburg, Sweden
87. University of Hawaii, Honolulu, HI, USA
88. University of Maryland, Baltimore, MD, USA
89. University of Newcastle, New-South-Wales, Australia
90. Wellcome Trust Center for Human Genetics, University of Oxford, Oxford, UK
91. University of Rostock, Rostock, Germany
92. University of Texas-Houston, Health Sciences Center, Houston, TX, USA
93. University of Utah, Salt Lake City, UT, USA
94. University of Vermont and Fletcher Allen Health Care, Burlington, VT, USA
95. University of Virginia, Charlottesville, VA, USA
96. University of Washington, Seattle, WA, USA
97. University of Washington, Harborview Medical Center, Seattle, WA, USA
98. University of Western Ontario, Robarts Research Institute, Ontario, Canada
99. Vall d'Hebron Hospital, Barcelona, Spain
100. Wake Forest University, Winston-Salem, NC, USA
101. Washington University of St. Louis, St. Louis, MO, USA
102. Yale New Haven Hospital, Yale School of Medicine, Yale, CT, USA

## References

1. Christophersen, I. E. *et al.* Large-scale analyses of common and rare variants identify 12 new loci associated with atrial fibrillation. *Nat. Genet.* **57**, 289 (2017).
2. Yang, J., Lee, S. H., Goddard, M. E. & Visscher, P. M. GCTA: A tool for genome-wide complex trait analysis. *Am. J. Hum. Genet.* **88**, 76–82 (2011).
3. Purcell, S. *et al.* PLINK: a tool set for whole-genome association and population-based linkage analyses. *Am. J. Hum. Genet.* **81**, 559–575 (2007).
4. Chang, C. C. *et al.* Second-generation PLINK: rising to the challenge of larger and richer datasets. *Gigascience* **4**, 1–16 (2015).
5. NINDS Stroke Genetics Network (SiGN), International Stroke Genetics Consortium. Loci associated with ischaemic stroke and its subtypes (SiGN): a genome-wide association study. *Lancet Neurol.* **15**, 4–7 (2015).
6. Loh, P.-R. *et al.* Efficient Bayesian mixed-model analysis increases association power in large cohorts. *Nat. Genet.* **47**, 284–290 (2015).
